# Supplementary material for: Gene Regulatory Network Modeling of Macrophage Differentiation Corroborates the Continuum Hypothesis of Polarization States
Source: Front Physiol. 2018 Nov 27;9:1659. doi: 10.3389/fphys.2018.01659 (PMC6278720; doi:10.3389/fphys.2018.01659)
Supplement: Supplementary file 1 [file Table_1.xlsx]

## Sheet: Foglio2
Table of steady states of the macrophage polarization network. The nodes of the network are reported on columns. Each row represents a steady states. All 1040 steady states are reported, as well as the 16 cycling states at the bottom of the table. The cycling states are all made of three different states a(grouped in thicker cell borders).
IFNg_e	GM_CSF_e	IL1b_e	LPS_e	IC_e	IL4_e	IL10_e	IFNgR	CSF2Ra	IL1R	TLR4	FcgR	IL4Ra	IL10R	STAT1	STAT5	NF_kB	PPARg	STAT6	JMJD3	STAT3	IRF3	ERK	KLF4	SOCS1	IRF4	IL1b	IFNb	IL10_out
0	0	0	0	0	0	0	0	0	0	0	0	0	0	0	0	0	0	0	0	0	0	0	0	0	0	0	0	0
1	0	0	0	0	0	0	1	0	0	0	0	0	0	1	0	0	0	0	0	0	0	0	0	0	0	0	0	0
0	1	0	0	0	0	0	0	1	0	0	0	0	0	0	1	0	0	0	0	0	0	0	0	0	0	0	0	0
1	1	0	0	0	0	0	1	1	0	0	0	0	0	1	1	0	0	0	0	0	0	0	0	0	0	0	0	0
0	0	1	0	0	0	0	0	0	1	0	0	0	0	0	0	1	0	0	0	0	0	0	0	0	0	1	0	0
1	0	1	0	0	0	0	1	0	1	0	0	0	0	1	0	1	0	0	0	0	0	0	0	0	0	1	0	0
0	1	1	0	0	0	0	0	1	1	0	0	0	0	0	1	1	0	0	0	0	0	0	0	0	0	1	0	0
1	1	1	0	0	0	0	1	1	1	0	0	0	0	1	1	1	0	0	0	0	0	0	0	0	0	1	0	0
0	0	0	1	0	0	0	1	0	1	1	0	0	0	1	0	1	0	0	0	0	1	0	0	0	0	1	1	0
1	0	0	1	0	0	0	1	0	1	1	0	0	0	1	0	1	0	0	0	0	1	0	0	0	0	1	1	0
0	1	0	1	0	0	0	1	1	1	1	0	0	0	1	1	1	0	0	0	0	1	0	0	0	0	1	1	0
1	1	0	1	0	0	0	1	1	1	1	0	0	0	1	1	1	0	0	0	0	1	0	0	0	0	1	1	0
0	0	1	1	0	0	0	1	0	1	1	0	0	0	1	0	1	0	0	0	0	1	0	0	0	0	1	1	0
1	0	1	1	0	0	0	1	0	1	1	0	0	0	1	0	1	0	0	0	0	1	0	0	0	0	1	1	0
0	1	1	1	0	0	0	1	1	1	1	0	0	0	1	1	1	0	0	0	0	1	0	0	0	0	1	1	0
1	1	1	1	0	0	0	1	1	1	1	0	0	0	1	1	1	0	0	0	0	1	0	0	0	0	1	1	0
0	0	0	0	1	0	0	0	0	0	0	0	0	0	0	0	0	0	0	0	0	0	0	0	0	0	0	0	0
1	0	0	0	1	0	0	1	0	0	0	0	0	0	1	0	0	0	0	0	0	0	0	0	0	0	0	0	0
0	1	0	0	1	0	0	0	1	0	0	0	0	0	0	1	0	0	0	0	0	0	0	0	0	0	0	0	0
1	1	0	0	1	0	0	1	1	0	0	0	0	0	1	1	0	0	0	0	0	0	0	0	0	0	0	0	0
0	0	1	0	1	0	0	0	0	1	0	0	0	0	0	0	1	0	0	0	0	0	0	0	0	0	1	0	0
1	0	1	0	1	0	0	1	0	1	0	0	0	0	1	0	1	0	0	0	0	0	0	0	0	0	1	0	0
0	1	1	0	1	0	0	0	1	1	0	0	0	0	0	1	1	0	0	0	0	0	0	0	0	0	1	0	0
1	1	1	0	1	0	0	1	1	1	0	0	0	0	1	1	1	0	0	0	0	0	0	0	0	0	1	0	0
0	0	0	1	1	0	0	0	0	0	0	1	0	1	0	0	0	0	0	0	0	0	1	0	0	0	0	0	1
1	0	0	1	1	0	0	1	0	0	0	1	0	1	1	0	0	0	0	0	0	0	1	0	0	0	0	0	1
0	1	0	1	1	0	0	0	1	0	0	1	0	1	0	1	0	0	0	0	0	0	1	0	0	0	0	0	1
1	1	0	1	1	0	0	1	1	0	0	1	0	1	1	1	0	0	0	0	0	0	1	0	0	0	0	0	1
0	0	1	1	1	0	0	0	0	1	0	1	0	1	0	0	0	0	0	0	0	0	1	0	0	0	0	0	1
1	0	1	1	1	0	0	1	0	1	0	1	0	1	1	0	0	0	0	0	0	0	1	0	0	0	0	0	1
0	1	1	1	1	0	0	0	1	1	0	1	0	1	0	1	0	0	0	0	0	0	1	0	0	0	0	0	1
1	1	1	1	1	0	0	1	1	1	0	1	0	1	1	1	0	0	0	0	0	0	1	0	0	0	0	0	1
0	0	0	0	0	1	0	0	0	0	0	0	1	1	0	0	0	1	1	1	0	0	0	1	1	1	0	0	1
1	0	0	0	0	1	0	1	0	0	0	0	1	1	0	0	0	1	1	1	0	0	0	1	1	1	0	0	1
0	1	0	0	0	1	0	0	1	0	0	0	1	1	0	0	0	1	1	1	0	0	0	1	1	1	0	0	1
1	1	0	0	0	1	0	1	1	0	0	0	1	1	0	0	0	1	1	1	0	0	0	1	1	1	0	0	1
0	0	1	0	0	1	0	0	0	1	0	0	1	1	0	0	0	1	1	1	0	0	0	1	1	1	0	0	1
1	0	1	0	0	1	0	1	0	1	0	0	1	1	0	0	0	1	1	1	0	0	0	1	1	1	0	0	1
0	1	1	0	0	1	0	0	1	1	0	0	1	1	0	0	0	1	1	1	0	0	0	1	1	1	0	0	1
1	1	1	0	0	1	0	1	1	1	0	0	1	1	0	0	0	1	1	1	0	0	0	1	1	1	0	0	1
0	0	0	1	0	1	0	1	0	0	1	0	1	1	0	0	0	1	1	1	0	1	0	1	1	1	0	1	1
1	0	0	1	0	1	0	1	0	0	1	0	1	1	0	0	0	1	1	1	0	1	0	1	1	1	0	1	1
0	1	0	1	0	1	0	1	1	0	1	0	1	1	0	0	0	1	1	1	0	1	0	1	1	1	0	1	1
1	1	0	1	0	1	0	1	1	0	1	0	1	1	0	0	0	1	1	1	0	1	0	1	1	1	0	1	1
0	0	1	1	0	1	0	1	0	1	1	0	1	1	0	0	0	1	1	1	0	1	0	1	1	1	0	1	1
1	0	1	1	0	1	0	1	0	1	1	0	1	1	0	0	0	1	1	1	0	1	0	1	1	1	0	1	1
0	1	1	1	0	1	0	1	1	1	1	0	1	1	0	0	0	1	1	1	0	1	0	1	1	1	0	1	1
1	1	1	1	0	1	0	1	1	1	1	0	1	1	0	0	0	1	1	1	0	1	0	1	1	1	0	1	1
0	0	0	0	1	1	0	0	0	0	0	0	1	1	0	0	0	1	1	1	0	0	0	1	1	1	0	0	1
1	0	0	0	1	1	0	1	0	0	0	0	1	1	0	0	0	1	1	1	0	0	0	1	1	1	0	0	1
0	1	0	0	1	1	0	0	1	0	0	0	1	1	0	0	0	1	1	1	0	0	0	1	1	1	0	0	1
1	1	0	0	1	1	0	1	1	0	0	0	1	1	0	0	0	1	1	1	0	0	0	1	1	1	0	0	1
0	0	1	0	1	1	0	0	0	1	0	0	1	1	0	0	0	1	1	1	0	0	0	1	1	1	0	0	1
1	0	1	0	1	1	0	1	0	1	0	0	1	1	0	0	0	1	1	1	0	0	0	1	1	1	0	0	1
0	1	1	0	1	1	0	0	1	1	0	0	1	1	0	0	0	1	1	1	0	0	0	1	1	1	0	0	1
1	1	1	0	1	1	0	1	1	1	0	0	1	1	0	0	0	1	1	1	0	0	0	1	1	1	0	0	1
0	0	0	1	1	1	0	0	0	0	0	1	1	1	0	0	0	1	1	1	0	0	1	1	1	1	0	0	1
1	0	0	1	1	1	0	1	0	0	0	1	1	1	0	0	0	1	1	1	0	0	1	1	1	1	0	0	1
0	1	0	1	1	1	0	0	1	0	0	1	1	1	0	0	0	1	1	1	0	0	1	1	1	1	0	0	1
1	1	0	1	1	1	0	1	1	0	0	1	1	1	0	0	0	1	1	1	0	0	1	1	1	1	0	0	1
0	0	1	1	1	1	0	0	0	1	0	1	1	1	0	0	0	1	1	1	0	0	1	1	1	1	0	0	1
1	0	1	1	1	1	0	1	0	1	0	1	1	1	0	0	0	1	1	1	0	0	1	1	1	1	0	0	1
0	1	1	1	1	1	0	0	1	1	0	1	1	1	0	0	0	1	1	1	0	0	1	1	1	1	0	0	1
1	1	1	1	1	1	0	1	1	1	0	1	1	1	0	0	0	1	1	1	0	0	1	1	1	1	0	0	1
0	0	0	0	0	0	1	0	0	0	0	0	0	1	0	0	0	0	0	0	1	0	0	0	0	0	0	0	1
1	0	0	0	0	0	1	1	0	0	0	0	0	1	0	0	0	0	0	0	1	0	0	0	0	0	0	0	1
0	1	0	0	0	0	1	0	1	0	0	0	0	1	0	0	0	0	0	0	1	0	0	0	0	0	0	0	1
1	1	0	0	0	0	1	1	1	0	0	0	0	1	0	0	0	0	0	0	1	0	0	0	0	0	0	0	1
0	0	1	0	0	0	1	0	0	1	0	0	0	1	0	0	0	0	0	0	1	0	0	0	0	0	0	0	1
1	0	1	0	0	0	1	1	0	1	0	0	0	1	0	0	0	0	0	0	1	0	0	0	0	0	0	0	1
0	1	1	0	0	0	1	0	1	1	0	0	0	1	0	0	0	0	0	0	1	0	0	0	0	0	0	0	1
1	1	1	0	0	0	1	1	1	1	0	0	0	1	0	0	0	0	0	0	1	0	0	0	0	0	0	0	1
0	0	0	1	0	0	1	1	0	0	1	0	0	1	0	0	0	0	0	0	1	1	0	0	0	0	0	1	1
1	0	0	1	0	0	1	1	0	0	1	0	0	1	0	0	0	0	0	0	1	1	0	0	0	0	0	1	1
0	1	0	1	0	0	1	1	1	0	1	0	0	1	0	0	0	0	0	0	1	1	0	0	0	0	0	1	1
1	1	0	1	0	0	1	1	1	0	1	0	0	1	0	0	0	0	0	0	1	1	0	0	0	0	0	1	1
0	0	1	1	0	0	1	1	0	1	1	0	0	1	0	0	0	0	0	0	1	1	0	0	0	0	0	1	1
1	0	1	1	0	0	1	1	0	1	1	0	0	1	0	0	0	0	0	0	1	1	0	0	0	0	0	1	1
0	1	1	1	0	0	1	1	1	1	1	0	0	1	0	0	0	0	0	0	1	1	0	0	0	0	0	1	1
1	1	1	1	0	0	1	1	1	1	1	0	0	1	0	0	0	0	0	0	1	1	0	0	0	0	0	1	1
0	0	0	0	1	0	1	0	0	0	0	0	0	1	0	0	0	0	0	0	1	0	0	0	0	0	0	0	1
1	0	0	0	1	0	1	1	0	0	0	0	0	1	0	0	0	0	0	0	1	0	0	0	0	0	0	0	1
0	1	0	0	1	0	1	0	1	0	0	0	0	1	0	0	0	0	0	0	1	0	0	0	0	0	0	0	1
1	1	0	0	1	0	1	1	1	0	0	0	0	1	0	0	0	0	0	0	1	0	0	0	0	0	0	0	1
0	0	1	0	1	0	1	0	0	1	0	0	0	1	0	0	0	0	0	0	1	0	0	0	0	0	0	0	1
1	0	1	0	1	0	1	1	0	1	0	0	0	1	0	0	0	0	0	0	1	0	0	0	0	0	0	0	1
0	1	1	0	1	0	1	0	1	1	0	0	0	1	0	0	0	0	0	0	1	0	0	0	0	0	0	0	1
1	1	1	0	1	0	1	1	1	1	0	0	0	1	0	0	0	0	0	0	1	0	0	0	0	0	0	0	1
0	0	0	1	1	0	1	0	0	0	0	1	0	1	0	0	0	0	0	0	0	0	1	0	0	0	0	0	1
1	0	0	1	1	0	1	1	0	0	0	1	0	1	1	0	0	0	0	0	0	0	1	0	0	0	0	0	1
0	1	0	1	1	0	1	0	1	0	0	1	0	1	0	1	0	0	0	0	0	0	1	0	0	0	0	0	1
1	1	0	1	1	0	1	1	1	0	0	1	0	1	1	1	0	0	0	0	0	0	1	0	0	0	0	0	1
0	0	1	1	1	0	1	0	0	1	0	1	0	1	0	0	0	0	0	0	0	0	1	0	0	0	0	0	1
1	0	1	1	1	0	1	1	0	1	0	1	0	1	1	0	0	0	0	0	0	0	1	0	0	0	0	0	1
0	1	1	1	1	0	1	0	1	1	0	1	0	1	0	1	0	0	0	0	0	0	1	0	0	0	0	0	1
1	1	1	1	1	0	1	1	1	1	0	1	0	1	1	1	0	0	0	0	0	0	1	0	0	0	0	0	1
0	0	0	0	0	1	1	0	0	0	0	0	1	1	0	0	0	1	1	1	0	0	0	1	1	1	0	0	1
1	0	0	0	0	1	1	1	0	0	0	0	1	1	0	0	0	1	1	1	0	0	0	1	1	1	0	0	1
0	1	0	0	0	1	1	0	1	0	0	0	1	1	0	0	0	1	1	1	0	0	0	1	1	1	0	0	1
1	1	0	0	0	1	1	1	1	0	0	0	1	1	0	0	0	1	1	1	0	0	0	1	1	1	0	0	1
0	0	1	0	0	1	1	0	0	1	0	0	1	1	0	0	0	1	1	1	0	0	0	1	1	1	0	0	1
1	0	1	0	0	1	1	1	0	1	0	0	1	1	0	0	0	1	1	1	0	0	0	1	1	1	0	0	1
0	1	1	0	0	1	1	0	1	1	0	0	1	1	0	0	0	1	1	1	0	0	0	1	1	1	0	0	1
1	1	1	0	0	1	1	1	1	1	0	0	1	1	0	0	0	1	1	1	0	0	0	1	1	1	0	0	1
0	0	0	1	0	1	1	1	0	0	1	0	1	1	0	0	0	1	1	1	0	1	0	1	1	1	0	1	1
1	0	0	1	0	1	1	1	0	0	1	0	1	1	0	0	0	1	1	1	0	1	0	1	1	1	0	1	1
0	1	0	1	0	1	1	1	1	0	1	0	1	1	0	0	0	1	1	1	0	1	0	1	1	1	0	1	1
1	1	0	1	0	1	1	1	1	0	1	0	1	1	0	0	0	1	1	1	0	1	0	1	1	1	0	1	1
0	0	1	1	0	1	1	1	0	1	1	0	1	1	0	0	0	1	1	1	0	1	0	1	1	1	0	1	1
1	0	1	1	0	1	1	1	0	1	1	0	1	1	0	0	0	1	1	1	0	1	0	1	1	1	0	1	1
0	1	1	1	0	1	1	1	1	1	1	0	1	1	0	0	0	1	1	1	0	1	0	1	1	1	0	1	1
1	1	1	1	0	1	1	1	1	1	1	0	1	1	0	0	0	1	1	1	0	1	0	1	1	1	0	1	1
0	0	0	0	1	1	1	0	0	0	0	0	1	1	0	0	0	1	1	1	0	0	0	1	1	1	0	0	1
1	0	0	0	1	1	1	1	0	0	0	0	1	1	0	0	0	1	1	1	0	0	0	1	1	1	0	0	1
0	1	0	0	1	1	1	0	1	0	0	0	1	1	0	0	0	1	1	1	0	0	0	1	1	1	0	0	1
1	1	0	0	1	1	1	1	1	0	0	0	1	1	0	0	0	1	1	1	0	0	0	1	1	1	0	0	1
0	0	1	0	1	1	1	0	0	1	0	0	1	1	0	0	0	1	1	1	0	0	0	1	1	1	0	0	1
1	0	1	0	1	1	1	1	0	1	0	0	1	1	0	0	0	1	1	1	0	0	0	1	1	1	0	0	1
0	1	1	0	1	1	1	0	1	1	0	0	1	1	0	0	0	1	1	1	0	0	0	1	1	1	0	0	1
1	1	1	0	1	1	1	1	1	1	0	0	1	1	0	0	0	1	1	1	0	0	0	1	1	1	0	0	1
0	0	0	1	1	1	1	0	0	0	0	1	1	1	0	0	0	1	1	1	0	0	1	1	1	1	0	0	1
1	0	0	1	1	1	1	1	0	0	0	1	1	1	0	0	0	1	1	1	0	0	1	1	1	1	0	0	1
0	1	0	1	1	1	1	0	1	0	0	1	1	1	0	0	0	1	1	1	0	0	1	1	1	1	0	0	1
1	1	0	1	1	1	1	1	1	0	0	1	1	1	0	0	0	1	1	1	0	0	1	1	1	1	0	0	1
0	0	1	1	1	1	1	0	0	1	0	1	1	1	0	0	0	1	1	1	0	0	1	1	1	1	0	0	1
1	0	1	1	1	1	1	1	0	1	0	1	1	1	0	0	0	1	1	1	0	0	1	1	1	1	0	0	1
0	1	1	1	1	1	1	0	1	1	0	1	1	1	0	0	0	1	1	1	0	0	1	1	1	1	0	0	1
1	1	1	1	1	1	1	1	1	1	0	1	1	1	0	0	0	1	1	1	0	0	1	1	1	1	0	0	1
0	0	0	0	0	0	0	0	0	0	0	0	0	1	0	0	0	0	0	0	1	0	1	0	0	0	0	0	1
1	0	0	0	0	0	0	1	0	0	0	0	0	1	0	0	0	0	0	0	1	0	1	0	0	0	0	0	1
0	1	0	0	0	0	0	0	1	0	0	0	0	1	0	0	0	0	0	0	1	0	1	0	0	0	0	0	1
1	1	0	0	0	0	0	1	1	0	0	0	0	1	0	0	0	0	0	0	1	0	1	0	0	0	0	0	1
0	0	1	0	0	0	0	0	0	1	0	0	0	1	0	0	0	0	0	0	1	0	1	0	0	0	0	0	1
1	0	1	0	0	0	0	1	0	1	0	0	0	1	0	0	0	0	0	0	1	0	1	0	0	0	0	0	1
0	1	1	0	0	0	0	0	1	1	0	0	0	1	0	0	0	0	0	0	1	0	1	0	0	0	0	0	1
1	1	1	0	0	0	0	1	1	1	0	0	0	1	0	0	0	0	0	0	1	0	1	0	0	0	0	0	1
0	0	0	1	0	0	0	1	0	0	1	0	0	1	0	0	0	0	0	0	1	1	1	0	0	0	0	1	1
1	0	0	1	0	0	0	1	0	0	1	0	0	1	0	0	0	0	0	0	1	1	1	0	0	0	0	1	1
0	1	0	1	0	0	0	1	1	0	1	0	0	1	0	0	0	0	0	0	1	1	1	0	0	0	0	1	1
1	1	0	1	0	0	0	1	1	0	1	0	0	1	0	0	0	0	0	0	1	1	1	0	0	0	0	1	1
0	0	1	1	0	0	0	1	0	1	1	0	0	1	0	0	0	0	0	0	1	1	1	0	0	0	0	1	1
1	0	1	1	0	0	0	1	0	1	1	0	0	1	0	0	0	0	0	0	1	1	1	0	0	0	0	1	1
0	1	1	1	0	0	0	1	1	1	1	0	0	1	0	0	0	0	0	0	1	1	1	0	0	0	0	1	1
1	1	1	1	0	0	0	1	1	1	1	0	0	1	0	0	0	0	0	0	1	1	1	0	0	0	0	1	1
0	0	0	0	1	0	0	0	0	0	0	0	0	1	0	0	0	0	0	0	1	0	1	0	0	0	0	0	1
1	0	0	0	1	0	0	1	0	0	0	0	0	1	0	0	0	0	0	0	1	0	1	0	0	0	0	0	1
0	1	0	0	1	0	0	0	1	0	0	0	0	1	0	0	0	0	0	0	1	0	1	0	0	0	0	0	1
1	1	0	0	1	0	0	1	1	0	0	0	0	1	0	0	0	0	0	0	1	0	1	0	0	0	0	0	1
0	0	1	0	1	0	0	0	0	1	0	0	0	1	0	0	0	0	0	0	1	0	1	0	0	0	0	0	1
1	0	1	0	1	0	0	1	0	1	0	0	0	1	0	0	0	0	0	0	1	0	1	0	0	0	0	0	1
0	1	1	0	1	0	0	0	1	1	0	0	0	1	0	0	0	0	0	0	1	0	1	0	0	0	0	0	1
1	1	1	0	1	0	0	1	1	1	0	0	0	1	0	0	0	0	0	0	1	0	1	0	0	0	0	0	1
0	0	0	0	0	1	0	0	0	0	0	0	1	1	0	0	0	1	1	1	0	0	1	1	1	1	0	0	1
1	0	0	0	0	1	0	1	0	0	0	0	1	1	0	0	0	1	1	1	0	0	1	1	1	1	0	0	1
0	1	0	0	0	1	0	0	1	0	0	0	1	1	0	0	0	1	1	1	0	0	1	1	1	1	0	0	1
1	1	0	0	0	1	0	1	1	0	0	0	1	1	0	0	0	1	1	1	0	0	1	1	1	1	0	0	1
0	0	1	0	0	1	0	0	0	1	0	0	1	1	0	0	0	1	1	1	0	0	1	1	1	1	0	0	1
1	0	1	0	0	1	0	1	0	1	0	0	1	1	0	0	0	1	1	1	0	0	1	1	1	1	0	0	1
0	1	1	0	0	1	0	0	1	1	0	0	1	1	0	0	0	1	1	1	0	0	1	1	1	1	0	0	1
1	1	1	0	0	1	0	1	1	1	0	0	1	1	0	0	0	1	1	1	0	0	1	1	1	1	0	0	1
0	0	0	1	0	1	0	1	0	0	1	0	1	1	0	0	0	1	1	1	0	1	1	1	1	1	0	1	1
1	0	0	1	0	1	0	1	0	0	1	0	1	1	0	0	0	1	1	1	0	1	1	1	1	1	0	1	1
0	1	0	1	0	1	0	1	1	0	1	0	1	1	0	0	0	1	1	1	0	1	1	1	1	1	0	1	1
1	1	0	1	0	1	0	1	1	0	1	0	1	1	0	0	0	1	1	1	0	1	1	1	1	1	0	1	1
0	0	1	1	0	1	0	1	0	1	1	0	1	1	0	0	0	1	1	1	0	1	1	1	1	1	0	1	1
1	0	1	1	0	1	0	1	0	1	1	0	1	1	0	0	0	1	1	1	0	1	1	1	1	1	0	1	1
0	1	1	1	0	1	0	1	1	1	1	0	1	1	0	0	0	1	1	1	0	1	1	1	1	1	0	1	1
1	1	1	1	0	1	0	1	1	1	1	0	1	1	0	0	0	1	1	1	0	1	1	1	1	1	0	1	1
0	0	0	0	1	1	0	0	0	0	0	0	1	1	0	0	0	1	1	1	0	0	1	1	1	1	0	0	1
1	0	0	0	1	1	0	1	0	0	0	0	1	1	0	0	0	1	1	1	0	0	1	1	1	1	0	0	1
0	1	0	0	1	1	0	0	1	0	0	0	1	1	0	0	0	1	1	1	0	0	1	1	1	1	0	0	1
1	1	0	0	1	1	0	1	1	0	0	0	1	1	0	0	0	1	1	1	0	0	1	1	1	1	0	0	1
0	0	1	0	1	1	0	0	0	1	0	0	1	1	0	0	0	1	1	1	0	0	1	1	1	1	0	0	1
1	0	1	0	1	1	0	1	0	1	0	0	1	1	0	0	0	1	1	1	0	0	1	1	1	1	0	0	1
0	1	1	0	1	1	0	0	1	1	0	0	1	1	0	0	0	1	1	1	0	0	1	1	1	1	0	0	1
1	1	1	0	1	1	0	1	1	1	0	0	1	1	0	0	0	1	1	1	0	0	1	1	1	1	0	0	1
0	0	0	0	0	0	1	0	0	0	0	0	0	1	0	0	0	0	0	0	1	0	1	0	0	0	0	0	1
1	0	0	0	0	0	1	1	0	0	0	0	0	1	0	0	0	0	0	0	1	0	1	0	0	0	0	0	1
0	1	0	0	0	0	1	0	1	0	0	0	0	1	0	0	0	0	0	0	1	0	1	0	0	0	0	0	1
1	1	0	0	0	0	1	1	1	0	0	0	0	1	0	0	0	0	0	0	1	0	1	0	0	0	0	0	1
0	0	1	0	0	0	1	0	0	1	0	0	0	1	0	0	0	0	0	0	1	0	1	0	0	0	0	0	1
1	0	1	0	0	0	1	1	0	1	0	0	0	1	0	0	0	0	0	0	1	0	1	0	0	0	0	0	1
0	1	1	0	0	0	1	0	1	1	0	0	0	1	0	0	0	0	0	0	1	0	1	0	0	0	0	0	1
1	1	1	0	0	0	1	1	1	1	0	0	0	1	0	0	0	0	0	0	1	0	1	0	0	0	0	0	1
0	0	0	1	0	0	1	1	0	0	1	0	0	1	0	0	0	0	0	0	1	1	1	0	0	0	0	1	1
1	0	0	1	0	0	1	1	0	0	1	0	0	1	0	0	0	0	0	0	1	1	1	0	0	0	0	1	1
0	1	0	1	0	0	1	1	1	0	1	0	0	1	0	0	0	0	0	0	1	1	1	0	0	0	0	1	1
1	1	0	1	0	0	1	1	1	0	1	0	0	1	0	0	0	0	0	0	1	1	1	0	0	0	0	1	1
0	0	1	1	0	0	1	1	0	1	1	0	0	1	0	0	0	0	0	0	1	1	1	0	0	0	0	1	1
1	0	1	1	0	0	1	1	0	1	1	0	0	1	0	0	0	0	0	0	1	1	1	0	0	0	0	1	1
0	1	1	1	0	0	1	1	1	1	1	0	0	1	0	0	0	0	0	0	1	1	1	0	0	0	0	1	1
1	1	1	1	0	0	1	1	1	1	1	0	0	1	0	0	0	0	0	0	1	1	1	0	0	0	0	1	1
0	0	0	0	1	0	1	0	0	0	0	0	0	1	0	0	0	0	0	0	1	0	1	0	0	0	0	0	1
1	0	0	0	1	0	1	1	0	0	0	0	0	1	0	0	0	0	0	0	1	0	1	0	0	0	0	0	1
0	1	0	0	1	0	1	0	1	0	0	0	0	1	0	0	0	0	0	0	1	0	1	0	0	0	0	0	1
1	1	0	0	1	0	1	1	1	0	0	0	0	1	0	0	0	0	0	0	1	0	1	0	0	0	0	0	1
0	0	1	0	1	0	1	0	0	1	0	0	0	1	0	0	0	0	0	0	1	0	1	0	0	0	0	0	1
1	0	1	0	1	0	1	1	0	1	0	0	0	1	0	0	0	0	0	0	1	0	1	0	0	0	0	0	1
0	1	1	0	1	0	1	0	1	1	0	0	0	1	0	0	0	0	0	0	1	0	1	0	0	0	0	0	1
1	1	1	0	1	0	1	1	1	1	0	0	0	1	0	0	0	0	0	0	1	0	1	0	0	0	0	0	1
0	0	0	0	0	1	1	0	0	0	0	0	1	1	0	0	0	1	1	1	0	0	1	1	1	1	0	0	1
1	0	0	0	0	1	1	1	0	0	0	0	1	1	0	0	0	1	1	1	0	0	1	1	1	1	0	0	1
0	1	0	0	0	1	1	0	1	0	0	0	1	1	0	0	0	1	1	1	0	0	1	1	1	1	0	0	1
1	1	0	0	0	1	1	1	1	0	0	0	1	1	0	0	0	1	1	1	0	0	1	1	1	1	0	0	1
0	0	1	0	0	1	1	0	0	1	0	0	1	1	0	0	0	1	1	1	0	0	1	1	1	1	0	0	1
1	0	1	0	0	1	1	1	0	1	0	0	1	1	0	0	0	1	1	1	0	0	1	1	1	1	0	0	1
0	1	1	0	0	1	1	0	1	1	0	0	1	1	0	0	0	1	1	1	0	0	1	1	1	1	0	0	1
1	1	1	0	0	1	1	1	1	1	0	0	1	1	0	0	0	1	1	1	0	0	1	1	1	1	0	0	1
0	0	0	1	0	1	1	1	0	0	1	0	1	1	0	0	0	1	1	1	0	1	1	1	1	1	0	1	1
1	0	0	1	0	1	1	1	0	0	1	0	1	1	0	0	0	1	1	1	0	1	1	1	1	1	0	1	1
0	1	0	1	0	1	1	1	1	0	1	0	1	1	0	0	0	1	1	1	0	1	1	1	1	1	0	1	1
1	1	0	1	0	1	1	1	1	0	1	0	1	1	0	0	0	1	1	1	0	1	1	1	1	1	0	1	1
0	0	1	1	0	1	1	1	0	1	1	0	1	1	0	0	0	1	1	1	0	1	1	1	1	1	0	1	1
1	0	1	1	0	1	1	1	0	1	1	0	1	1	0	0	0	1	1	1	0	1	1	1	1	1	0	1	1
0	1	1	1	0	1	1	1	1	1	1	0	1	1	0	0	0	1	1	1	0	1	1	1	1	1	0	1	1
1	1	1	1	0	1	1	1	1	1	1	0	1	1	0	0	0	1	1	1	0	1	1	1	1	1	0	1	1
0	0	0	0	1	1	1	0	0	0	0	0	1	1	0	0	0	1	1	1	0	0	1	1	1	1	0	0	1
1	0	0	0	1	1	1	1	0	0	0	0	1	1	0	0	0	1	1	1	0	0	1	1	1	1	0	0	1
0	1	0	0	1	1	1	0	1	0	0	0	1	1	0	0	0	1	1	1	0	0	1	1	1	1	0	0	1
1	1	0	0	1	1	1	1	1	0	0	0	1	1	0	0	0	1	1	1	0	0	1	1	1	1	0	0	1
0	0	1	0	1	1	1	0	0	1	0	0	1	1	0	0	0	1	1	1	0	0	1	1	1	1	0	0	1
1	0	1	0	1	1	1	1	0	1	0	0	1	1	0	0	0	1	1	1	0	0	1	1	1	1	0	0	1
0	1	1	0	1	1	1	0	1	1	0	0	1	1	0	0	0	1	1	1	0	0	1	1	1	1	0	0	1
1	1	1	0	1	1	1	1	1	1	0	0	1	1	0	0	0	1	1	1	0	0	1	1	1	1	0	0	1
0	0	0	0	0	0	0	0	0	0	0	0	0	1	0	0	0	1	1	1	0	0	0	1	1	1	0	0	1
1	0	0	0	0	0	0	1	0	0	0	0	0	1	0	0	0	1	1	1	0	0	0	1	1	1	0	0	1
0	1	0	0	0	0	0	0	1	0	0	0	0	1	0	0	0	1	1	1	0	0	0	1	1	1	0	0	1
1	1	0	0	0	0	0	1	1	0	0	0	0	1	0	0	0	1	1	1	0	0	0	1	1	1	0	0	1
0	0	1	0	0	0	0	0	0	1	0	0	0	1	0	0	0	1	1	1	0	0	0	1	1	1	0	0	1
1	0	1	0	0	0	0	1	0	1	0	0	0	1	0	0	0	1	1	1	0	0	0	1	1	1	0	0	1
0	1	1	0	0	0	0	0	1	1	0	0	0	1	0	0	0	1	1	1	0	0	0	1	1	1	0	0	1
1	1	1	0	0	0	0	1	1	1	0	0	0	1	0	0	0	1	1	1	0	0	0	1	1	1	0	0	1
0	0	0	1	0	0	0	1	0	0	1	0	0	1	0	0	0	1	1	1	0	1	0	1	1	1	0	1	1
1	0	0	1	0	0	0	1	0	0	1	0	0	1	0	0	0	1	1	1	0	1	0	1	1	1	0	1	1
0	1	0	1	0	0	0	1	1	0	1	0	0	1	0	0	0	1	1	1	0	1	0	1	1	1	0	1	1
1	1	0	1	0	0	0	1	1	0	1	0	0	1	0	0	0	1	1	1	0	1	0	1	1	1	0	1	1
0	0	1	1	0	0	0	1	0	1	1	0	0	1	0	0	0	1	1	1	0	1	0	1	1	1	0	1	1
1	0	1	1	0	0	0	1	0	1	1	0	0	1	0	0	0	1	1	1	0	1	0	1	1	1	0	1	1
0	1	1	1	0	0	0	1	1	1	1	0	0	1	0	0	0	1	1	1	0	1	0	1	1	1	0	1	1
1	1	1	1	0	0	0	1	1	1	1	0	0	1	0	0	0	1	1	1	0	1	0	1	1	1	0	1	1
0	0	0	0	1	0	0	0	0	0	0	0	0	1	0	0	0	1	1	1	0	0	0	1	1	1	0	0	1
1	0	0	0	1	0	0	1	0	0	0	0	0	1	0	0	0	1	1	1	0	0	0	1	1	1	0	0	1
0	1	0	0	1	0	0	0	1	0	0	0	0	1	0	0	0	1	1	1	0	0	0	1	1	1	0	0	1
1	1	0	0	1	0	0	1	1	0	0	0	0	1	0	0	0	1	1	1	0	0	0	1	1	1	0	0	1
0	0	1	0	1	0	0	0	0	1	0	0	0	1	0	0	0	1	1	1	0	0	0	1	1	1	0	0	1
1	0	1	0	1	0	0	1	0	1	0	0	0	1	0	0	0	1	1	1	0	0	0	1	1	1	0	0	1
0	1	1	0	1	0	0	0	1	1	0	0	0	1	0	0	0	1	1	1	0	0	0	1	1	1	0	0	1
1	1	1	0	1	0	0	1	1	1	0	0	0	1	0	0	0	1	1	1	0	0	0	1	1	1	0	0	1
0	0	0	1	1	0	0	0	0	0	0	1	0	1	0	0	0	1	1	1	0	0	1	1	1	1	0	0	1
1	0	0	1	1	0	0	1	0	0	0	1	0	1	0	0	0	1	1	1	0	0	1	1	1	1	0	0	1
0	1	0	1	1	0	0	0	1	0	0	1	0	1	0	0	0	1	1	1	0	0	1	1	1	1	0	0	1
1	1	0	1	1	0	0	1	1	0	0	1	0	1	0	0	0	1	1	1	0	0	1	1	1	1	0	0	1
0	0	1	1	1	0	0	0	0	1	0	1	0	1	0	0	0	1	1	1	0	0	1	1	1	1	0	0	1
1	0	1	1	1	0	0	1	0	1	0	1	0	1	0	0	0	1	1	1	0	0	1	1	1	1	0	0	1
0	1	1	1	1	0	0	0	1	1	0	1	0	1	0	0	0	1	1	1	0	0	1	1	1	1	0	0	1
1	1	1	1	1	0	0	1	1	1	0	1	0	1	0	0	0	1	1	1	0	0	1	1	1	1	0	0	1
0	0	0	0	0	0	1	0	0	0	0	0	0	1	0	0	0	1	1	1	0	0	0	1	1	1	0	0	1
1	0	0	0	0	0	1	1	0	0	0	0	0	1	0	0	0	1	1	1	0	0	0	1	1	1	0	0	1
0	1	0	0	0	0	1	0	1	0	0	0	0	1	0	0	0	1	1	1	0	0	0	1	1	1	0	0	1
1	1	0	0	0	0	1	1	1	0	0	0	0	1	0	0	0	1	1	1	0	0	0	1	1	1	0	0	1
0	0	1	0	0	0	1	0	0	1	0	0	0	1	0	0	0	1	1	1	0	0	0	1	1	1	0	0	1
1	0	1	0	0	0	1	1	0	1	0	0	0	1	0	0	0	1	1	1	0	0	0	1	1	1	0	0	1
0	1	1	0	0	0	1	0	1	1	0	0	0	1	0	0	0	1	1	1	0	0	0	1	1	1	0	0	1
1	1	1	0	0	0	1	1	1	1	0	0	0	1	0	0	0	1	1	1	0	0	0	1	1	1	0	0	1
0	0	0	1	0	0	1	1	0	0	1	0	0	1	0	0	0	1	1	1	0	1	0	1	1	1	0	1	1
1	0	0	1	0	0	1	1	0	0	1	0	0	1	0	0	0	1	1	1	0	1	0	1	1	1	0	1	1
0	1	0	1	0	0	1	1	1	0	1	0	0	1	0	0	0	1	1	1	0	1	0	1	1	1	0	1	1
1	1	0	1	0	0	1	1	1	0	1	0	0	1	0	0	0	1	1	1	0	1	0	1	1	1	0	1	1
0	0	1	1	0	0	1	1	0	1	1	0	0	1	0	0	0	1	1	1	0	1	0	1	1	1	0	1	1
1	0	1	1	0	0	1	1	0	1	1	0	0	1	0	0	0	1	1	1	0	1	0	1	1	1	0	1	1
0	1	1	1	0	0	1	1	1	1	1	0	0	1	0	0	0	1	1	1	0	1	0	1	1	1	0	1	1
1	1	1	1	0	0	1	1	1	1	1	0	0	1	0	0	0	1	1	1	0	1	0	1	1	1	0	1	1
0	0	0	0	1	0	1	0	0	0	0	0	0	1	0	0	0	1	1	1	0	0	0	1	1	1	0	0	1
1	0	0	0	1	0	1	1	0	0	0	0	0	1	0	0	0	1	1	1	0	0	0	1	1	1	0	0	1
0	1	0	0	1	0	1	0	1	0	0	0	0	1	0	0	0	1	1	1	0	0	0	1	1	1	0	0	1
1	1	0	0	1	0	1	1	1	0	0	0	0	1	0	0	0	1	1	1	0	0	0	1	1	1	0	0	1
0	0	1	0	1	0	1	0	0	1	0	0	0	1	0	0	0	1	1	1	0	0	0	1	1	1	0	0	1
1	0	1	0	1	0	1	1	0	1	0	0	0	1	0	0	0	1	1	1	0	0	0	1	1	1	0	0	1
0	1	1	0	1	0	1	0	1	1	0	0	0	1	0	0	0	1	1	1	0	0	0	1	1	1	0	0	1
1	1	1	0	1	0	1	1	1	1	0	0	0	1	0	0	0	1	1	1	0	0	0	1	1	1	0	0	1
0	0	0	1	1	0	1	0	0	0	0	1	0	1	0	0	0	1	1	1	0	0	1	1	1	1	0	0	1
1	0	0	1	1	0	1	1	0	0	0	1	0	1	0	0	0	1	1	1	0	0	1	1	1	1	0	0	1
0	1	0	1	1	0	1	0	1	0	0	1	0	1	0	0	0	1	1	1	0	0	1	1	1	1	0	0	1
1	1	0	1	1	0	1	1	1	0	0	1	0	1	0	0	0	1	1	1	0	0	1	1	1	1	0	0	1
0	0	1	1	1	0	1	0	0	1	0	1	0	1	0	0	0	1	1	1	0	0	1	1	1	1	0	0	1
1	0	1	1	1	0	1	1	0	1	0	1	0	1	0	0	0	1	1	1	0	0	1	1	1	1	0	0	1
0	1	1	1	1	0	1	0	1	1	0	1	0	1	0	0	0	1	1	1	0	0	1	1	1	1	0	0	1
1	1	1	1	1	0	1	1	1	1	0	1	0	1	0	0	0	1	1	1	0	0	1	1	1	1	0	0	1
0	0	0	0	0	0	0	0	0	0	0	0	0	1	0	0	0	1	1	1	0	0	1	1	1	1	0	0	1
1	0	0	0	0	0	0	1	0	0	0	0	0	1	0	0	0	1	1	1	0	0	1	1	1	1	0	0	1
0	1	0	0	0	0	0	0	1	0	0	0	0	1	0	0	0	1	1	1	0	0	1	1	1	1	0	0	1
1	1	0	0	0	0	0	1	1	0	0	0	0	1	0	0	0	1	1	1	0	0	1	1	1	1	0	0	1
0	0	1	0	0	0	0	0	0	1	0	0	0	1	0	0	0	1	1	1	0	0	1	1	1	1	0	0	1
1	0	1	0	0	0	0	1	0	1	0	0	0	1	0	0	0	1	1	1	0	0	1	1	1	1	0	0	1
0	1	1	0	0	0	0	0	1	1	0	0	0	1	0	0	0	1	1	1	0	0	1	1	1	1	0	0	1
1	1	1	0	0	0	0	1	1	1	0	0	0	1	0	0	0	1	1	1	0	0	1	1	1	1	0	0	1
0	0	0	1	0	0	0	1	0	0	1	0	0	1	0	0	0	1	1	1	0	1	1	1	1	1	0	1	1
1	0	0	1	0	0	0	1	0	0	1	0	0	1	0	0	0	1	1	1	0	1	1	1	1	1	0	1	1
0	1	0	1	0	0	0	1	1	0	1	0	0	1	0	0	0	1	1	1	0	1	1	1	1	1	0	1	1
1	1	0	1	0	0	0	1	1	0	1	0	0	1	0	0	0	1	1	1	0	1	1	1	1	1	0	1	1
0	0	1	1	0	0	0	1	0	1	1	0	0	1	0	0	0	1	1	1	0	1	1	1	1	1	0	1	1
1	0	1	1	0	0	0	1	0	1	1	0	0	1	0	0	0	1	1	1	0	1	1	1	1	1	0	1	1
0	1	1	1	0	0	0	1	1	1	1	0	0	1	0	0	0	1	1	1	0	1	1	1	1	1	0	1	1
1	1	1	1	0	0	0	1	1	1	1	0	0	1	0	0	0	1	1	1	0	1	1	1	1	1	0	1	1
0	0	0	0	1	0	0	0	0	0	0	0	0	1	0	0	0	1	1	1	0	0	1	1	1	1	0	0	1
1	0	0	0	1	0	0	1	0	0	0	0	0	1	0	0	0	1	1	1	0	0	1	1	1	1	0	0	1
0	1	0	0	1	0	0	0	1	0	0	0	0	1	0	0	0	1	1	1	0	0	1	1	1	1	0	0	1
1	1	0	0	1	0	0	1	1	0	0	0	0	1	0	0	0	1	1	1	0	0	1	1	1	1	0	0	1
0	0	1	0	1	0	0	0	0	1	0	0	0	1	0	0	0	1	1	1	0	0	1	1	1	1	0	0	1
1	0	1	0	1	0	0	1	0	1	0	0	0	1	0	0	0	1	1	1	0	0	1	1	1	1	0	0	1
0	1	1	0	1	0	0	0	1	1	0	0	0	1	0	0	0	1	1	1	0	0	1	1	1	1	0	0	1
1	1	1	0	1	0	0	1	1	1	0	0	0	1	0	0	0	1	1	1	0	0	1	1	1	1	0	0	1
0	0	0	0	0	0	1	0	0	0	0	0	0	1	0	0	0	1	1	1	0	0	1	1	1	1	0	0	1
1	0	0	0	0	0	1	1	0	0	0	0	0	1	0	0	0	1	1	1	0	0	1	1	1	1	0	0	1
0	1	0	0	0	0	1	0	1	0	0	0	0	1	0	0	0	1	1	1	0	0	1	1	1	1	0	0	1
1	1	0	0	0	0	1	1	1	0	0	0	0	1	0	0	0	1	1	1	0	0	1	1	1	1	0	0	1
0	0	1	0	0	0	1	0	0	1	0	0	0	1	0	0	0	1	1	1	0	0	1	1	1	1	0	0	1
1	0	1	0	0	0	1	1	0	1	0	0	0	1	0	0	0	1	1	1	0	0	1	1	1	1	0	0	1
0	1	1	0	0	0	1	0	1	1	0	0	0	1	0	0	0	1	1	1	0	0	1	1	1	1	0	0	1
1	1	1	0	0	0	1	1	1	1	0	0	0	1	0	0	0	1	1	1	0	0	1	1	1	1	0	0	1
0	0	0	1	0	0	1	1	0	0	1	0	0	1	0	0	0	1	1	1	0	1	1	1	1	1	0	1	1
1	0	0	1	0	0	1	1	0	0	1	0	0	1	0	0	0	1	1	1	0	1	1	1	1	1	0	1	1
0	1	0	1	0	0	1	1	1	0	1	0	0	1	0	0	0	1	1	1	0	1	1	1	1	1	0	1	1
1	1	0	1	0	0	1	1	1	0	1	0	0	1	0	0	0	1	1	1	0	1	1	1	1	1	0	1	1
0	0	1	1	0	0	1	1	0	1	1	0	0	1	0	0	0	1	1	1	0	1	1	1	1	1	0	1	1
1	0	1	1	0	0	1	1	0	1	1	0	0	1	0	0	0	1	1	1	0	1	1	1	1	1	0	1	1
0	1	1	1	0	0	1	1	1	1	1	0	0	1	0	0	0	1	1	1	0	1	1	1	1	1	0	1	1
1	1	1	1	0	0	1	1	1	1	1	0	0	1	0	0	0	1	1	1	0	1	1	1	1	1	0	1	1
0	0	0	0	1	0	1	0	0	0	0	0	0	1	0	0	0	1	1	1	0	0	1	1	1	1	0	0	1
1	0	0	0	1	0	1	1	0	0	0	0	0	1	0	0	0	1	1	1	0	0	1	1	1	1	0	0	1
0	1	0	0	1	0	1	0	1	0	0	0	0	1	0	0	0	1	1	1	0	0	1	1	1	1	0	0	1
1	1	0	0	1	0	1	1	1	0	0	0	0	1	0	0	0	1	1	1	0	0	1	1	1	1	0	0	1
0	0	1	0	1	0	1	0	0	1	0	0	0	1	0	0	0	1	1	1	0	0	1	1	1	1	0	0	1
1	0	1	0	1	0	1	1	0	1	0	0	0	1	0	0	0	1	1	1	0	0	1	1	1	1	0	0	1
0	1	1	0	1	0	1	0	1	1	0	0	0	1	0	0	0	1	1	1	0	0	1	1	1	1	0	0	1
1	1	1	0	1	0	1	1	1	1	0	0	0	1	0	0	0	1	1	1	0	0	1	1	1	1	0	0	1
0	0	0	0	0	0	0	0	0	0	0	0	0	1	0	0	0	0	0	0	1	0	0	0	0	0	0	0	1
1	0	0	0	0	0	0	1	0	0	0	0	0	1	0	0	0	0	0	0	1	0	0	0	0	0	0	0	1
0	1	0	0	0	0	0	0	1	0	0	0	0	1	0	0	0	0	0	0	1	0	0	0	0	0	0	0	1
1	1	0	0	0	0	0	1	1	0	0	0	0	1	0	0	0	0	0	0	1	0	0	0	0	0	0	0	1
0	0	1	0	0	0	0	0	0	1	0	0	0	1	0	0	0	0	0	0	1	0	0	0	0	0	0	0	1
1	0	1	0	0	0	0	1	0	1	0	0	0	1	0	0	0	0	0	0	1	0	0	0	0	0	0	0	1
0	1	1	0	0	0	0	0	1	1	0	0	0	1	0	0	0	0	0	0	1	0	0	0	0	0	0	0	1
1	1	1	0	0	0	0	1	1	1	0	0	0	1	0	0	0	0	0	0	1	0	0	0	0	0	0	0	1
0	0	0	1	0	0	0	1	0	0	1	0	0	1	0	0	0	0	0	0	1	1	0	0	0	0	0	1	1
1	0	0	1	0	0	0	1	0	0	1	0	0	1	0	0	0	0	0	0	1	1	0	0	0	0	0	1	1
0	1	0	1	0	0	0	1	1	0	1	0	0	1	0	0	0	0	0	0	1	1	0	0	0	0	0	1	1
1	1	0	1	0	0	0	1	1	0	1	0	0	1	0	0	0	0	0	0	1	1	0	0	0	0	0	1	1
0	0	1	1	0	0	0	1	0	1	1	0	0	1	0	0	0	0	0	0	1	1	0	0	0	0	0	1	1
1	0	1	1	0	0	0	1	0	1	1	0	0	1	0	0	0	0	0	0	1	1	0	0	0	0	0	1	1
0	1	1	1	0	0	0	1	1	1	1	0	0	1	0	0	0	0	0	0	1	1	0	0	0	0	0	1	1
1	1	1	1	0	0	0	1	1	1	1	0	0	1	0	0	0	0	0	0	1	1	0	0	0	0	0	1	1
0	0	0	0	1	0	0	0	0	0	0	0	0	1	0	0	0	0	0	0	1	0	0	0	0	0	0	0	1
1	0	0	0	1	0	0	1	0	0	0	0	0	1	0	0	0	0	0	0	1	0	0	0	0	0	0	0	1
0	1	0	0	1	0	0	0	1	0	0	0	0	1	0	0	0	0	0	0	1	0	0	0	0	0	0	0	1
1	1	0	0	1	0	0	1	1	0	0	0	0	1	0	0	0	0	0	0	1	0	0	0	0	0	0	0	1
0	0	1	0	1	0	0	0	0	1	0	0	0	1	0	0	0	0	0	0	1	0	0	0	0	0	0	0	1
1	0	1	0	1	0	0	1	0	1	0	0	0	1	0	0	0	0	0	0	1	0	0	0	0	0	0	0	1
0	1	1	0	1	0	0	0	1	1	0	0	0	1	0	0	0	0	0	0	1	0	0	0	0	0	0	0	1
1	1	1	0	1	0	0	1	1	1	0	0	0	1	0	0	0	0	0	0	1	0	0	0	0	0	0	0	1
0	0	0	0	0	0	0	0	0	0	0	0	0	1	0	0	0	1	0	0	0	0	0	0	0	0	0	0	1
1	0	0	0	0	0	0	1	0	0	0	0	0	1	1	0	0	1	0	0	0	0	0	0	0	0	0	0	1
0	1	0	0	0	0	0	0	1	0	0	0	0	1	0	1	0	1	0	0	0	0	0	0	0	0	0	0	1
1	1	0	0	0	0	0	1	1	0	0	0	0	1	1	1	0	1	0	0	0	0	0	0	0	0	0	0	1
0	0	1	0	0	0	0	0	0	1	0	0	0	1	0	0	0	1	0	0	0	0	0	0	0	0	0	0	1
1	0	1	0	0	0	0	1	0	1	0	0	0	1	1	0	0	1	0	0	0	0	0	0	0	0	0	0	1
0	1	1	0	0	0	0	0	1	1	0	0	0	1	0	1	0	1	0	0	0	0	0	0	0	0	0	0	1
1	1	1	0	0	0	0	1	1	1	0	0	0	1	1	1	0	1	0	0	0	0	0	0	0	0	0	0	1
0	0	0	1	0	0	0	1	0	0	1	0	0	1	1	0	0	1	0	0	0	1	0	0	0	0	0	1	1
1	0	0	1	0	0	0	1	0	0	1	0	0	1	1	0	0	1	0	0	0	1	0	0	0	0	0	1	1
0	1	0	1	0	0	0	1	1	0	1	0	0	1	1	1	0	1	0	0	0	1	0	0	0	0	0	1	1
1	1	0	1	0	0	0	1	1	0	1	0	0	1	1	1	0	1	0	0	0	1	0	0	0	0	0	1	1
0	0	1	1	0	0	0	1	0	1	1	0	0	1	1	0	0	1	0	0	0	1	0	0	0	0	0	1	1
1	0	1	1	0	0	0	1	0	1	1	0	0	1	1	0	0	1	0	0	0	1	0	0	0	0	0	1	1
0	1	1	1	0	0	0	1	1	1	1	0	0	1	1	1	0	1	0	0	0	1	0	0	0	0	0	1	1
1	1	1	1	0	0	0	1	1	1	1	0	0	1	1	1	0	1	0	0	0	1	0	0	0	0	0	1	1
0	0	0	0	1	0	0	0	0	0	0	0	0	1	0	0	0	1	0	0	0	0	0	0	0	0	0	0	1
1	0	0	0	1	0	0	1	0	0	0	0	0	1	1	0	0	1	0	0	0	0	0	0	0	0	0	0	1
0	1	0	0	1	0	0	0	1	0	0	0	0	1	0	1	0	1	0	0	0	0	0	0	0	0	0	0	1
1	1	0	0	1	0	0	1	1	0	0	0	0	1	1	1	0	1	0	0	0	0	0	0	0	0	0	0	1
0	0	1	0	1	0	0	0	0	1	0	0	0	1	0	0	0	1	0	0	0	0	0	0	0	0	0	0	1
1	0	1	0	1	0	0	1	0	1	0	0	0	1	1	0	0	1	0	0	0	0	0	0	0	0	0	0	1
0	1	1	0	1	0	0	0	1	1	0	0	0	1	0	1	0	1	0	0	0	0	0	0	0	0	0	0	1
1	1	1	0	1	0	0	1	1	1	0	0	0	1	1	1	0	1	0	0	0	0	0	0	0	0	0	0	1
0	0	0	1	1	0	0	0	0	0	0	1	0	1	0	0	0	1	0	0	0	0	1	0	0	0	0	0	1
1	0	0	1	1	0	0	1	0	0	0	1	0	1	1	0	0	1	0	0	0	0	1	0	0	0	0	0	1
0	1	0	1	1	0	0	0	1	0	0	1	0	1	0	1	0	1	0	0	0	0	1	0	0	0	0	0	1
1	1	0	1	1	0	0	1	1	0	0	1	0	1	1	1	0	1	0	0	0	0	1	0	0	0	0	0	1
0	0	1	1	1	0	0	0	0	1	0	1	0	1	0	0	0	1	0	0	0	0	1	0	0	0	0	0	1
1	0	1	1	1	0	0	1	0	1	0	1	0	1	1	0	0	1	0	0	0	0	1	0	0	0	0	0	1
0	1	1	1	1	0	0	0	1	1	0	1	0	1	0	1	0	1	0	0	0	0	1	0	0	0	0	0	1
1	1	1	1	1	0	0	1	1	1	0	1	0	1	1	1	0	1	0	0	0	0	1	0	0	0	0	0	1
0	0	0	0	0	0	1	0	0	0	0	0	0	1	0	0	0	1	0	0	0	0	0	0	0	0	0	0	1
1	0	0	0	0	0	1	1	0	0	0	0	0	1	1	0	0	1	0	0	0	0	0	0	0	0	0	0	1
0	1	0	0	0	0	1	0	1	0	0	0	0	1	0	1	0	1	0	0	0	0	0	0	0	0	0	0	1
1	1	0	0	0	0	1	1	1	0	0	0	0	1	1	1	0	1	0	0	0	0	0	0	0	0	0	0	1
0	0	1	0	0	0	1	0	0	1	0	0	0	1	0	0	0	1	0	0	0	0	0	0	0	0	0	0	1
1	0	1	0	0	0	1	1	0	1	0	0	0	1	1	0	0	1	0	0	0	0	0	0	0	0	0	0	1
0	1	1	0	0	0	1	0	1	1	0	0	0	1	0	1	0	1	0	0	0	0	0	0	0	0	0	0	1
1	1	1	0	0	0	1	1	1	1	0	0	0	1	1	1	0	1	0	0	0	0	0	0	0	0	0	0	1
0	0	0	1	0	0	1	1	0	0	1	0	0	1	1	0	0	1	0	0	0	1	0	0	0	0	0	1	1
1	0	0	1	0	0	1	1	0	0	1	0	0	1	1	0	0	1	0	0	0	1	0	0	0	0	0	1	1
0	1	0	1	0	0	1	1	1	0	1	0	0	1	1	1	0	1	0	0	0	1	0	0	0	0	0	1	1
1	1	0	1	0	0	1	1	1	0	1	0	0	1	1	1	0	1	0	0	0	1	0	0	0	0	0	1	1
0	0	1	1	0	0	1	1	0	1	1	0	0	1	1	0	0	1	0	0	0	1	0	0	0	0	0	1	1
1	0	1	1	0	0	1	1	0	1	1	0	0	1	1	0	0	1	0	0	0	1	0	0	0	0	0	1	1
0	1	1	1	0	0	1	1	1	1	1	0	0	1	1	1	0	1	0	0	0	1	0	0	0	0	0	1	1
1	1	1	1	0	0	1	1	1	1	1	0	0	1	1	1	0	1	0	0	0	1	0	0	0	0	0	1	1
0	0	0	0	1	0	1	0	0	0	0	0	0	1	0	0	0	1	0	0	0	0	0	0	0	0	0	0	1
1	0	0	0	1	0	1	1	0	0	0	0	0	1	1	0	0	1	0	0	0	0	0	0	0	0	0	0	1
0	1	0	0	1	0	1	0	1	0	0	0	0	1	0	1	0	1	0	0	0	0	0	0	0	0	0	0	1
1	1	0	0	1	0	1	1	1	0	0	0	0	1	1	1	0	1	0	0	0	0	0	0	0	0	0	0	1
0	0	1	0	1	0	1	0	0	1	0	0	0	1	0	0	0	1	0	0	0	0	0	0	0	0	0	0	1
1	0	1	0	1	0	1	1	0	1	0	0	0	1	1	0	0	1	0	0	0	0	0	0	0	0	0	0	1
0	1	1	0	1	0	1	0	1	1	0	0	0	1	0	1	0	1	0	0	0	0	0	0	0	0	0	0	1
1	1	1	0	1	0	1	1	1	1	0	0	0	1	1	1	0	1	0	0	0	0	0	0	0	0	0	0	1
0	0	0	1	1	0	1	0	0	0	0	1	0	1	0	0	0	1	0	0	0	0	1	0	0	0	0	0	1
1	0	0	1	1	0	1	1	0	0	0	1	0	1	1	0	0	1	0	0	0	0	1	0	0	0	0	0	1
0	1	0	1	1	0	1	0	1	0	0	1	0	1	0	1	0	1	0	0	0	0	1	0	0	0	0	0	1
1	1	0	1	1	0	1	1	1	0	0	1	0	1	1	1	0	1	0	0	0	0	1	0	0	0	0	0	1
0	0	1	1	1	0	1	0	0	1	0	1	0	1	0	0	0	1	0	0	0	0	1	0	0	0	0	0	1
1	0	1	1	1	0	1	1	0	1	0	1	0	1	1	0	0	1	0	0	0	0	1	0	0	0	0	0	1
0	1	1	1	1	0	1	0	1	1	0	1	0	1	0	1	0	1	0	0	0	0	1	0	0	0	0	0	1
1	1	1	1	1	0	1	1	1	1	0	1	0	1	1	1	0	1	0	0	0	0	1	0	0	0	0	0	1
0	0	0	0	0	0	0	0	0	0	0	0	0	1	0	0	0	1	0	0	0	0	1	0	0	0	0	0	1
1	0	0	0	0	0	0	1	0	0	0	0	0	1	1	0	0	1	0	0	0	0	1	0	0	0	0	0	1
0	1	0	0	0	0	0	0	1	0	0	0	0	1	0	1	0	1	0	0	0	0	1	0	0	0	0	0	1
1	1	0	0	0	0	0	1	1	0	0	0	0	1	1	1	0	1	0	0	0	0	1	0	0	0	0	0	1
0	0	1	0	0	0	0	0	0	1	0	0	0	1	0	0	0	1	0	0	0	0	1	0	0	0	0	0	1
1	0	1	0	0	0	0	1	0	1	0	0	0	1	1	0	0	1	0	0	0	0	1	0	0	0	0	0	1
0	1	1	0	0	0	0	0	1	1	0	0	0	1	0	1	0	1	0	0	0	0	1	0	0	0	0	0	1
1	1	1	0	0	0	0	1	1	1	0	0	0	1	1	1	0	1	0	0	0	0	1	0	0	0	0	0	1
0	0	0	1	0	0	0	1	0	0	1	0	0	1	1	0	0	1	0	0	0	1	1	0	0	0	0	1	1
1	0	0	1	0	0	0	1	0	0	1	0	0	1	1	0	0	1	0	0	0	1	1	0	0	0	0	1	1
0	1	0	1	0	0	0	1	1	0	1	0	0	1	1	1	0	1	0	0	0	1	1	0	0	0	0	1	1
1	1	0	1	0	0	0	1	1	0	1	0	0	1	1	1	0	1	0	0	0	1	1	0	0	0	0	1	1
0	0	1	1	0	0	0	1	0	1	1	0	0	1	1	0	0	1	0	0	0	1	1	0	0	0	0	1	1
1	0	1	1	0	0	0	1	0	1	1	0	0	1	1	0	0	1	0	0	0	1	1	0	0	0	0	1	1
0	1	1	1	0	0	0	1	1	1	1	0	0	1	1	1	0	1	0	0	0	1	1	0	0	0	0	1	1
1	1	1	1	0	0	0	1	1	1	1	0	0	1	1	1	0	1	0	0	0	1	1	0	0	0	0	1	1
0	0	0	0	1	0	0	0	0	0	0	0	0	1	0	0	0	1	0	0	0	0	1	0	0	0	0	0	1
1	0	0	0	1	0	0	1	0	0	0	0	0	1	1	0	0	1	0	0	0	0	1	0	0	0	0	0	1
0	1	0	0	1	0	0	0	1	0	0	0	0	1	0	1	0	1	0	0	0	0	1	0	0	0	0	0	1
1	1	0	0	1	0	0	1	1	0	0	0	0	1	1	1	0	1	0	0	0	0	1	0	0	0	0	0	1
0	0	1	0	1	0	0	0	0	1	0	0	0	1	0	0	0	1	0	0	0	0	1	0	0	0	0	0	1
1	0	1	0	1	0	0	1	0	1	0	0	0	1	1	0	0	1	0	0	0	0	1	0	0	0	0	0	1
0	1	1	0	1	0	0	0	1	1	0	0	0	1	0	1	0	1	0	0	0	0	1	0	0	0	0	0	1
1	1	1	0	1	0	0	1	1	1	0	0	0	1	1	1	0	1	0	0	0	0	1	0	0	0	0	0	1
0	0	0	0	0	0	1	0	0	0	0	0	0	1	0	0	0	1	0	0	0	0	1	0	0	0	0	0	1
1	0	0	0	0	0	1	1	0	0	0	0	0	1	1	0	0	1	0	0	0	0	1	0	0	0	0	0	1
0	1	0	0	0	0	1	0	1	0	0	0	0	1	0	1	0	1	0	0	0	0	1	0	0	0	0	0	1
1	1	0	0	0	0	1	1	1	0	0	0	0	1	1	1	0	1	0	0	0	0	1	0	0	0	0	0	1
0	0	1	0	0	0	1	0	0	1	0	0	0	1	0	0	0	1	0	0	0	0	1	0	0	0	0	0	1
1	0	1	0	0	0	1	1	0	1	0	0	0	1	1	0	0	1	0	0	0	0	1	0	0	0	0	0	1
0	1	1	0	0	0	1	0	1	1	0	0	0	1	0	1	0	1	0	0	0	0	1	0	0	0	0	0	1
1	1	1	0	0	0	1	1	1	1	0	0	0	1	1	1	0	1	0	0	0	0	1	0	0	0	0	0	1
0	0	0	1	0	0	1	1	0	0	1	0	0	1	1	0	0	1	0	0	0	1	1	0	0	0	0	1	1
1	0	0	1	0	0	1	1	0	0	1	0	0	1	1	0	0	1	0	0	0	1	1	0	0	0	0	1	1
0	1	0	1	0	0	1	1	1	0	1	0	0	1	1	1	0	1	0	0	0	1	1	0	0	0	0	1	1
1	1	0	1	0	0	1	1	1	0	1	0	0	1	1	1	0	1	0	0	0	1	1	0	0	0	0	1	1
0	0	1	1	0	0	1	1	0	1	1	0	0	1	1	0	0	1	0	0	0	1	1	0	0	0	0	1	1
1	0	1	1	0	0	1	1	0	1	1	0	0	1	1	0	0	1	0	0	0	1	1	0	0	0	0	1	1
0	1	1	1	0	0	1	1	1	1	1	0	0	1	1	1	0	1	0	0	0	1	1	0	0	0	0	1	1
1	1	1	1	0	0	1	1	1	1	1	0	0	1	1	1	0	1	0	0	0	1	1	0	0	0	0	1	1
0	0	0	0	1	0	1	0	0	0	0	0	0	1	0	0	0	1	0	0	0	0	1	0	0	0	0	0	1
1	0	0	0	1	0	1	1	0	0	0	0	0	1	1	0	0	1	0	0	0	0	1	0	0	0	0	0	1
0	1	0	0	1	0	1	0	1	0	0	0	0	1	0	1	0	1	0	0	0	0	1	0	0	0	0	0	1
1	1	0	0	1	0	1	1	1	0	0	0	0	1	1	1	0	1	0	0	0	0	1	0	0	0	0	0	1
0	0	1	0	1	0	1	0	0	1	0	0	0	1	0	0	0	1	0	0	0	0	1	0	0	0	0	0	1
1	0	1	0	1	0	1	1	0	1	0	0	0	1	1	0	0	1	0	0	0	0	1	0	0	0	0	0	1
0	1	1	0	1	0	1	0	1	1	0	0	0	1	0	1	0	1	0	0	0	0	1	0	0	0	0	0	1
1	1	1	0	1	0	1	1	1	1	0	0	0	1	1	1	0	1	0	0	0	0	1	0	0	0	0	0	1
0	0	0	0	0	0	0	0	0	0	0	0	0	1	0	0	0	0	1	0	1	0	0	1	1	0	0	0	1
1	0	0	0	0	0	0	1	0	0	0	0	0	1	0	0	0	0	1	0	1	0	0	1	1	0	0	0	1
0	1	0	0	0	0	0	0	1	0	0	0	0	1	0	0	0	0	1	0	1	0	0	1	1	0	0	0	1
1	1	0	0	0	0	0	1	1	0	0	0	0	1	0	0	0	0	1	0	1	0	0	1	1	0	0	0	1
0	0	1	0	0	0	0	0	0	1	0	0	0	1	0	0	0	0	1	0	1	0	0	1	1	0	0	0	1
1	0	1	0	0	0	0	1	0	1	0	0	0	1	0	0	0	0	1	0	1	0	0	1	1	0	0	0	1
0	1	1	0	0	0	0	0	1	1	0	0	0	1	0	0	0	0	1	0	1	0	0	1	1	0	0	0	1
1	1	1	0	0	0	0	1	1	1	0	0	0	1	0	0	0	0	1	0	1	0	0	1	1	0	0	0	1
0	0	0	1	0	0	0	1	0	0	1	0	0	1	0	0	0	0	1	0	1	1	0	1	1	0	0	1	1
1	0	0	1	0	0	0	1	0	0	1	0	0	1	0	0	0	0	1	0	1	1	0	1	1	0	0	1	1
0	1	0	1	0	0	0	1	1	0	1	0	0	1	0	0	0	0	1	0	1	1	0	1	1	0	0	1	1
1	1	0	1	0	0	0	1	1	0	1	0	0	1	0	0	0	0	1	0	1	1	0	1	1	0	0	1	1
0	0	1	1	0	0	0	1	0	1	1	0	0	1	0	0	0	0	1	0	1	1	0	1	1	0	0	1	1
1	0	1	1	0	0	0	1	0	1	1	0	0	1	0	0	0	0	1	0	1	1	0	1	1	0	0	1	1
0	1	1	1	0	0	0	1	1	1	1	0	0	1	0	0	0	0	1	0	1	1	0	1	1	0	0	1	1
1	1	1	1	0	0	0	1	1	1	1	0	0	1	0	0	0	0	1	0	1	1	0	1	1	0	0	1	1
0	0	0	0	1	0	0	0	0	0	0	0	0	1	0	0	0	0	1	0	1	0	0	1	1	0	0	0	1
1	0	0	0	1	0	0	1	0	0	0	0	0	1	0	0	0	0	1	0	1	0	0	1	1	0	0	0	1
0	1	0	0	1	0	0	0	1	0	0	0	0	1	0	0	0	0	1	0	1	0	0	1	1	0	0	0	1
1	1	0	0	1	0	0	1	1	0	0	0	0	1	0	0	0	0	1	0	1	0	0	1	1	0	0	0	1
0	0	1	0	1	0	0	0	0	1	0	0	0	1	0	0	0	0	1	0	1	0	0	1	1	0	0	0	1
1	0	1	0	1	0	0	1	0	1	0	0	0	1	0	0	0	0	1	0	1	0	0	1	1	0	0	0	1
0	1	1	0	1	0	0	0	1	1	0	0	0	1	0	0	0	0	1	0	1	0	0	1	1	0	0	0	1
1	1	1	0	1	0	0	1	1	1	0	0	0	1	0	0	0	0	1	0	1	0	0	1	1	0	0	0	1
0	0	0	1	1	0	0	0	0	0	0	1	0	1	0	0	0	0	1	0	0	0	1	1	1	0	0	0	1
1	0	0	1	1	0	0	1	0	0	0	1	0	1	0	0	0	0	1	0	0	0	1	1	1	0	0	0	1
0	1	0	1	1	0	0	0	1	0	0	1	0	1	0	1	0	0	1	0	0	0	1	1	1	0	0	0	1
1	1	0	1	1	0	0	1	1	0	0	1	0	1	0	1	0	0	1	0	0	0	1	1	1	0	0	0	1
0	0	1	1	1	0	0	0	0	1	0	1	0	1	0	0	0	0	1	0	0	0	1	1	1	0	0	0	1
1	0	1	1	1	0	0	1	0	1	0	1	0	1	0	0	0	0	1	0	0	0	1	1	1	0	0	0	1
0	1	1	1	1	0	0	0	1	1	0	1	0	1	0	1	0	0	1	0	0	0	1	1	1	0	0	0	1
1	1	1	1	1	0	0	1	1	1	0	1	0	1	0	1	0	0	1	0	0	0	1	1	1	0	0	0	1
0	0	0	0	0	0	1	0	0	0	0	0	0	1	0	0	0	0	1	0	1	0	0	1	1	0	0	0	1
1	0	0	0	0	0	1	1	0	0	0	0	0	1	0	0	0	0	1	0	1	0	0	1	1	0	0	0	1
0	1	0	0	0	0	1	0	1	0	0	0	0	1	0	0	0	0	1	0	1	0	0	1	1	0	0	0	1
1	1	0	0	0	0	1	1	1	0	0	0	0	1	0	0	0	0	1	0	1	0	0	1	1	0	0	0	1
0	0	1	0	0	0	1	0	0	1	0	0	0	1	0	0	0	0	1	0	1	0	0	1	1	0	0	0	1
1	0	1	0	0	0	1	1	0	1	0	0	0	1	0	0	0	0	1	0	1	0	0	1	1	0	0	0	1
0	1	1	0	0	0	1	0	1	1	0	0	0	1	0	0	0	0	1	0	1	0	0	1	1	0	0	0	1
1	1	1	0	0	0	1	1	1	1	0	0	0	1	0	0	0	0	1	0	1	0	0	1	1	0	0	0	1
0	0	0	1	0	0	1	1	0	0	1	0	0	1	0	0	0	0	1	0	1	1	0	1	1	0	0	1	1
1	0	0	1	0	0	1	1	0	0	1	0	0	1	0	0	0	0	1	0	1	1	0	1	1	0	0	1	1
0	1	0	1	0	0	1	1	1	0	1	0	0	1	0	0	0	0	1	0	1	1	0	1	1	0	0	1	1
1	1	0	1	0	0	1	1	1	0	1	0	0	1	0	0	0	0	1	0	1	1	0	1	1	0	0	1	1
0	0	1	1	0	0	1	1	0	1	1	0	0	1	0	0	0	0	1	0	1	1	0	1	1	0	0	1	1
1	0	1	1	0	0	1	1	0	1	1	0	0	1	0	0	0	0	1	0	1	1	0	1	1	0	0	1	1
0	1	1	1	0	0	1	1	1	1	1	0	0	1	0	0	0	0	1	0	1	1	0	1	1	0	0	1	1
1	1	1	1	0	0	1	1	1	1	1	0	0	1	0	0	0	0	1	0	1	1	0	1	1	0	0	1	1
0	0	0	0	1	0	1	0	0	0	0	0	0	1	0	0	0	0	1	0	1	0	0	1	1	0	0	0	1
1	0	0	0	1	0	1	1	0	0	0	0	0	1	0	0	0	0	1	0	1	0	0	1	1	0	0	0	1
0	1	0	0	1	0	1	0	1	0	0	0	0	1	0	0	0	0	1	0	1	0	0	1	1	0	0	0	1
1	1	0	0	1	0	1	1	1	0	0	0	0	1	0	0	0	0	1	0	1	0	0	1	1	0	0	0	1
0	0	1	0	1	0	1	0	0	1	0	0	0	1	0	0	0	0	1	0	1	0	0	1	1	0	0	0	1
1	0	1	0	1	0	1	1	0	1	0	0	0	1	0	0	0	0	1	0	1	0	0	1	1	0	0	0	1
0	1	1	0	1	0	1	0	1	1	0	0	0	1	0	0	0	0	1	0	1	0	0	1	1	0	0	0	1
1	1	1	0	1	0	1	1	1	1	0	0	0	1	0	0	0	0	1	0	1	0	0	1	1	0	0	0	1
0	0	0	1	1	0	1	0	0	0	0	1	0	1	0	0	0	0	1	0	0	0	1	1	1	0	0	0	1
1	0	0	1	1	0	1	1	0	0	0	1	0	1	0	0	0	0	1	0	0	0	1	1	1	0	0	0	1
0	1	0	1	1	0	1	0	1	0	0	1	0	1	0	1	0	0	1	0	0	0	1	1	1	0	0	0	1
1	1	0	1	1	0	1	1	1	0	0	1	0	1	0	1	0	0	1	0	0	0	1	1	1	0	0	0	1
0	0	1	1	1	0	1	0	0	1	0	1	0	1	0	0	0	0	1	0	0	0	1	1	1	0	0	0	1
1	0	1	1	1	0	1	1	0	1	0	1	0	1	0	0	0	0	1	0	0	0	1	1	1	0	0	0	1
0	1	1	1	1	0	1	0	1	1	0	1	0	1	0	1	0	0	1	0	0	0	1	1	1	0	0	0	1
1	1	1	1	1	0	1	1	1	1	0	1	0	1	0	1	0	0	1	0	0	0	1	1	1	0	0	0	1
0	0	0	0	0	0	0	0	0	0	0	0	0	1	0	0	0	0	1	0	1	0	1	1	1	0	0	0	1
1	0	0	0	0	0	0	1	0	0	0	0	0	1	0	0	0	0	1	0	1	0	1	1	1	0	0	0	1
0	1	0	0	0	0	0	0	1	0	0	0	0	1	0	0	0	0	1	0	1	0	1	1	1	0	0	0	1
1	1	0	0	0	0	0	1	1	0	0	0	0	1	0	0	0	0	1	0	1	0	1	1	1	0	0	0	1
0	0	1	0	0	0	0	0	0	1	0	0	0	1	0	0	0	0	1	0	1	0	1	1	1	0	0	0	1
1	0	1	0	0	0	0	1	0	1	0	0	0	1	0	0	0	0	1	0	1	0	1	1	1	0	0	0	1
0	1	1	0	0	0	0	0	1	1	0	0	0	1	0	0	0	0	1	0	1	0	1	1	1	0	0	0	1
1	1	1	0	0	0	0	1	1	1	0	0	0	1	0	0	0	0	1	0	1	0	1	1	1	0	0	0	1
0	0	0	1	0	0	0	1	0	0	1	0	0	1	0	0	0	0	1	0	1	1	1	1	1	0	0	1	1
1	0	0	1	0	0	0	1	0	0	1	0	0	1	0	0	0	0	1	0	1	1	1	1	1	0	0	1	1
0	1	0	1	0	0	0	1	1	0	1	0	0	1	0	0	0	0	1	0	1	1	1	1	1	0	0	1	1
1	1	0	1	0	0	0	1	1	0	1	0	0	1	0	0	0	0	1	0	1	1	1	1	1	0	0	1	1
0	0	1	1	0	0	0	1	0	1	1	0	0	1	0	0	0	0	1	0	1	1	1	1	1	0	0	1	1
1	0	1	1	0	0	0	1	0	1	1	0	0	1	0	0	0	0	1	0	1	1	1	1	1	0	0	1	1
0	1	1	1	0	0	0	1	1	1	1	0	0	1	0	0	0	0	1	0	1	1	1	1	1	0	0	1	1
1	1	1	1	0	0	0	1	1	1	1	0	0	1	0	0	0	0	1	0	1	1	1	1	1	0	0	1	1
0	0	0	0	1	0	0	0	0	0	0	0	0	1	0	0	0	0	1	0	1	0	1	1	1	0	0	0	1
1	0	0	0	1	0	0	1	0	0	0	0	0	1	0	0	0	0	1	0	1	0	1	1	1	0	0	0	1
0	1	0	0	1	0	0	0	1	0	0	0	0	1	0	0	0	0	1	0	1	0	1	1	1	0	0	0	1
1	1	0	0	1	0	0	1	1	0	0	0	0	1	0	0	0	0	1	0	1	0	1	1	1	0	0	0	1
0	0	1	0	1	0	0	0	0	1	0	0	0	1	0	0	0	0	1	0	1	0	1	1	1	0	0	0	1
1	0	1	0	1	0	0	1	0	1	0	0	0	1	0	0	0	0	1	0	1	0	1	1	1	0	0	0	1
0	1	1	0	1	0	0	0	1	1	0	0	0	1	0	0	0	0	1	0	1	0	1	1	1	0	0	0	1
1	1	1	0	1	0	0	1	1	1	0	0	0	1	0	0	0	0	1	0	1	0	1	1	1	0	0	0	1
0	0	0	0	0	0	1	0	0	0	0	0	0	1	0	0	0	0	1	0	1	0	1	1	1	0	0	0	1
1	0	0	0	0	0	1	1	0	0	0	0	0	1	0	0	0	0	1	0	1	0	1	1	1	0	0	0	1
0	1	0	0	0	0	1	0	1	0	0	0	0	1	0	0	0	0	1	0	1	0	1	1	1	0	0	0	1
1	1	0	0	0	0	1	1	1	0	0	0	0	1	0	0	0	0	1	0	1	0	1	1	1	0	0	0	1
0	0	1	0	0	0	1	0	0	1	0	0	0	1	0	0	0	0	1	0	1	0	1	1	1	0	0	0	1
1	0	1	0	0	0	1	1	0	1	0	0	0	1	0	0	0	0	1	0	1	0	1	1	1	0	0	0	1
0	1	1	0	0	0	1	0	1	1	0	0	0	1	0	0	0	0	1	0	1	0	1	1	1	0	0	0	1
1	1	1	0	0	0	1	1	1	1	0	0	0	1	0	0	0	0	1	0	1	0	1	1	1	0	0	0	1
0	0	0	1	0	0	1	1	0	0	1	0	0	1	0	0	0	0	1	0	1	1	1	1	1	0	0	1	1
1	0	0	1	0	0	1	1	0	0	1	0	0	1	0	0	0	0	1	0	1	1	1	1	1	0	0	1	1
0	1	0	1	0	0	1	1	1	0	1	0	0	1	0	0	0	0	1	0	1	1	1	1	1	0	0	1	1
1	1	0	1	0	0	1	1	1	0	1	0	0	1	0	0	0	0	1	0	1	1	1	1	1	0	0	1	1
0	0	1	1	0	0	1	1	0	1	1	0	0	1	0	0	0	0	1	0	1	1	1	1	1	0	0	1	1
1	0	1	1	0	0	1	1	0	1	1	0	0	1	0	0	0	0	1	0	1	1	1	1	1	0	0	1	1
0	1	1	1	0	0	1	1	1	1	1	0	0	1	0	0	0	0	1	0	1	1	1	1	1	0	0	1	1
1	1	1	1	0	0	1	1	1	1	1	0	0	1	0	0	0	0	1	0	1	1	1	1	1	0	0	1	1
0	0	0	0	1	0	1	0	0	0	0	0	0	1	0	0	0	0	1	0	1	0	1	1	1	0	0	0	1
1	0	0	0	1	0	1	1	0	0	0	0	0	1	0	0	0	0	1	0	1	0	1	1	1	0	0	0	1
0	1	0	0	1	0	1	0	1	0	0	0	0	1	0	0	0	0	1	0	1	0	1	1	1	0	0	0	1
1	1	0	0	1	0	1	1	1	0	0	0	0	1	0	0	0	0	1	0	1	0	1	1	1	0	0	0	1
0	0	1	0	1	0	1	0	0	1	0	0	0	1	0	0	0	0	1	0	1	0	1	1	1	0	0	0	1
1	0	1	0	1	0	1	1	0	1	0	0	0	1	0	0	0	0	1	0	1	0	1	1	1	0	0	0	1
0	1	1	0	1	0	1	0	1	1	0	0	0	1	0	0	0	0	1	0	1	0	1	1	1	0	0	0	1
1	1	1	0	1	0	1	1	1	1	0	0	0	1	0	0	0	0	1	0	1	0	1	1	1	0	0	0	1
0	0	0	0	0	0	0	0	0	0	0	0	0	1	0	0	0	1	1	0	0	0	0	1	1	0	0	0	1
1	0	0	0	0	0	0	1	0	0	0	0	0	1	0	0	0	1	1	0	0	0	0	1	1	0	0	0	1
0	1	0	0	0	0	0	0	1	0	0	0	0	1	0	1	0	1	1	0	0	0	0	1	1	0	0	0	1
1	1	0	0	0	0	0	1	1	0	0	0	0	1	0	1	0	1	1	0	0	0	0	1	1	0	0	0	1
0	0	1	0	0	0	0	0	0	1	0	0	0	1	0	0	0	1	1	0	0	0	0	1	1	0	0	0	1
1	0	1	0	0	0	0	1	0	1	0	0	0	1	0	0	0	1	1	0	0	0	0	1	1	0	0	0	1
0	1	1	0	0	0	0	0	1	1	0	0	0	1	0	1	0	1	1	0	0	0	0	1	1	0	0	0	1
1	1	1	0	0	0	0	1	1	1	0	0	0	1	0	1	0	1	1	0	0	0	0	1	1	0	0	0	1
0	0	0	1	0	0	0	1	0	0	1	0	0	1	0	0	0	1	1	0	0	1	0	1	1	0	0	1	1
1	0	0	1	0	0	0	1	0	0	1	0	0	1	0	0	0	1	1	0	0	1	0	1	1	0	0	1	1
0	1	0	1	0	0	0	1	1	0	1	0	0	1	0	1	0	1	1	0	0	1	0	1	1	0	0	1	1
1	1	0	1	0	0	0	1	1	0	1	0	0	1	0	1	0	1	1	0	0	1	0	1	1	0	0	1	1
0	0	1	1	0	0	0	1	0	1	1	0	0	1	0	0	0	1	1	0	0	1	0	1	1	0	0	1	1
1	0	1	1	0	0	0	1	0	1	1	0	0	1	0	0	0	1	1	0	0	1	0	1	1	0	0	1	1
0	1	1	1	0	0	0	1	1	1	1	0	0	1	0	1	0	1	1	0	0	1	0	1	1	0	0	1	1
1	1	1	1	0	0	0	1	1	1	1	0	0	1	0	1	0	1	1	0	0	1	0	1	1	0	0	1	1
0	0	0	0	1	0	0	0	0	0	0	0	0	1	0	0	0	1	1	0	0	0	0	1	1	0	0	0	1
1	0	0	0	1	0	0	1	0	0	0	0	0	1	0	0	0	1	1	0	0	0	0	1	1	0	0	0	1
0	1	0	0	1	0	0	0	1	0	0	0	0	1	0	1	0	1	1	0	0	0	0	1	1	0	0	0	1
1	1	0	0	1	0	0	1	1	0	0	0	0	1	0	1	0	1	1	0	0	0	0	1	1	0	0	0	1
0	0	1	0	1	0	0	0	0	1	0	0	0	1	0	0	0	1	1	0	0	0	0	1	1	0	0	0	1
1	0	1	0	1	0	0	1	0	1	0	0	0	1	0	0	0	1	1	0	0	0	0	1	1	0	0	0	1
0	1	1	0	1	0	0	0	1	1	0	0	0	1	0	1	0	1	1	0	0	0	0	1	1	0	0	0	1
1	1	1	0	1	0	0	1	1	1	0	0	0	1	0	1	0	1	1	0	0	0	0	1	1	0	0	0	1
0	0	0	1	1	0	0	0	0	0	0	1	0	1	0	0	0	1	1	0	0	0	1	1	1	0	0	0	1
1	0	0	1	1	0	0	1	0	0	0	1	0	1	0	0	0	1	1	0	0	0	1	1	1	0	0	0	1
0	1	0	1	1	0	0	0	1	0	0	1	0	1	0	1	0	1	1	0	0	0	1	1	1	0	0	0	1
1	1	0	1	1	0	0	1	1	0	0	1	0	1	0	1	0	1	1	0	0	0	1	1	1	0	0	0	1
0	0	1	1	1	0	0	0	0	1	0	1	0	1	0	0	0	1	1	0	0	0	1	1	1	0	0	0	1
1	0	1	1	1	0	0	1	0	1	0	1	0	1	0	0	0	1	1	0	0	0	1	1	1	0	0	0	1
0	1	1	1	1	0	0	0	1	1	0	1	0	1	0	1	0	1	1	0	0	0	1	1	1	0	0	0	1
1	1	1	1	1	0	0	1	1	1	0	1	0	1	0	1	0	1	1	0	0	0	1	1	1	0	0	0	1
0	0	0	0	0	0	1	0	0	0	0	0	0	1	0	0	0	1	1	0	0	0	0	1	1	0	0	0	1
1	0	0	0	0	0	1	1	0	0	0	0	0	1	0	0	0	1	1	0	0	0	0	1	1	0	0	0	1
0	1	0	0	0	0	1	0	1	0	0	0	0	1	0	1	0	1	1	0	0	0	0	1	1	0	0	0	1
1	1	0	0	0	0	1	1	1	0	0	0	0	1	0	1	0	1	1	0	0	0	0	1	1	0	0	0	1
0	0	1	0	0	0	1	0	0	1	0	0	0	1	0	0	0	1	1	0	0	0	0	1	1	0	0	0	1
1	0	1	0	0	0	1	1	0	1	0	0	0	1	0	0	0	1	1	0	0	0	0	1	1	0	0	0	1
0	1	1	0	0	0	1	0	1	1	0	0	0	1	0	1	0	1	1	0	0	0	0	1	1	0	0	0	1
1	1	1	0	0	0	1	1	1	1	0	0	0	1	0	1	0	1	1	0	0	0	0	1	1	0	0	0	1
0	0	0	1	0	0	1	1	0	0	1	0	0	1	0	0	0	1	1	0	0	1	0	1	1	0	0	1	1
1	0	0	1	0	0	1	1	0	0	1	0	0	1	0	0	0	1	1	0	0	1	0	1	1	0	0	1	1
0	1	0	1	0	0	1	1	1	0	1	0	0	1	0	1	0	1	1	0	0	1	0	1	1	0	0	1	1
1	1	0	1	0	0	1	1	1	0	1	0	0	1	0	1	0	1	1	0	0	1	0	1	1	0	0	1	1
0	0	1	1	0	0	1	1	0	1	1	0	0	1	0	0	0	1	1	0	0	1	0	1	1	0	0	1	1
1	0	1	1	0	0	1	1	0	1	1	0	0	1	0	0	0	1	1	0	0	1	0	1	1	0	0	1	1
0	1	1	1	0	0	1	1	1	1	1	0	0	1	0	1	0	1	1	0	0	1	0	1	1	0	0	1	1
1	1	1	1	0	0	1	1	1	1	1	0	0	1	0	1	0	1	1	0	0	1	0	1	1	0	0	1	1
0	0	0	0	1	0	1	0	0	0	0	0	0	1	0	0	0	1	1	0	0	0	0	1	1	0	0	0	1
1	0	0	0	1	0	1	1	0	0	0	0	0	1	0	0	0	1	1	0	0	0	0	1	1	0	0	0	1
0	1	0	0	1	0	1	0	1	0	0	0	0	1	0	1	0	1	1	0	0	0	0	1	1	0	0	0	1
1	1	0	0	1	0	1	1	1	0	0	0	0	1	0	1	0	1	1	0	0	0	0	1	1	0	0	0	1
0	0	1	0	1	0	1	0	0	1	0	0	0	1	0	0	0	1	1	0	0	0	0	1	1	0	0	0	1
1	0	1	0	1	0	1	1	0	1	0	0	0	1	0	0	0	1	1	0	0	0	0	1	1	0	0	0	1
0	1	1	0	1	0	1	0	1	1	0	0	0	1	0	1	0	1	1	0	0	0	0	1	1	0	0	0	1
1	1	1	0	1	0	1	1	1	1	0	0	0	1	0	1	0	1	1	0	0	0	0	1	1	0	0	0	1
0	0	0	1	1	0	1	0	0	0	0	1	0	1	0	0	0	1	1	0	0	0	1	1	1	0	0	0	1
1	0	0	1	1	0	1	1	0	0	0	1	0	1	0	0	0	1	1	0	0	0	1	1	1	0	0	0	1
0	1	0	1	1	0	1	0	1	0	0	1	0	1	0	1	0	1	1	0	0	0	1	1	1	0	0	0	1
1	1	0	1	1	0	1	1	1	0	0	1	0	1	0	1	0	1	1	0	0	0	1	1	1	0	0	0	1
0	0	1	1	1	0	1	0	0	1	0	1	0	1	0	0	0	1	1	0	0	0	1	1	1	0	0	0	1
1	0	1	1	1	0	1	1	0	1	0	1	0	1	0	0	0	1	1	0	0	0	1	1	1	0	0	0	1
0	1	1	1	1	0	1	0	1	1	0	1	0	1	0	1	0	1	1	0	0	0	1	1	1	0	0	0	1
1	1	1	1	1	0	1	1	1	1	0	1	0	1	0	1	0	1	1	0	0	0	1	1	1	0	0	0	1
0	0	0	0	0	0	0	0	0	0	0	0	0	1	0	0	0	1	1	0	0	0	1	1	1	0	0	0	1
1	0	0	0	0	0	0	1	0	0	0	0	0	1	0	0	0	1	1	0	0	0	1	1	1	0	0	0	1
0	1	0	0	0	0	0	0	1	0	0	0	0	1	0	1	0	1	1	0	0	0	1	1	1	0	0	0	1
1	1	0	0	0	0	0	1	1	0	0	0	0	1	0	1	0	1	1	0	0	0	1	1	1	0	0	0	1
0	0	1	0	0	0	0	0	0	1	0	0	0	1	0	0	0	1	1	0	0	0	1	1	1	0	0	0	1
1	0	1	0	0	0	0	1	0	1	0	0	0	1	0	0	0	1	1	0	0	0	1	1	1	0	0	0	1
0	1	1	0	0	0	0	0	1	1	0	0	0	1	0	1	0	1	1	0	0	0	1	1	1	0	0	0	1
1	1	1	0	0	0	0	1	1	1	0	0	0	1	0	1	0	1	1	0	0	0	1	1	1	0	0	0	1
0	0	0	1	0	0	0	1	0	0	1	0	0	1	0	0	0	1	1	0	0	1	1	1	1	0	0	1	1
1	0	0	1	0	0	0	1	0	0	1	0	0	1	0	0	0	1	1	0	0	1	1	1	1	0	0	1	1
0	1	0	1	0	0	0	1	1	0	1	0	0	1	0	1	0	1	1	0	0	1	1	1	1	0	0	1	1
1	1	0	1	0	0	0	1	1	0	1	0	0	1	0	1	0	1	1	0	0	1	1	1	1	0	0	1	1
0	0	1	1	0	0	0	1	0	1	1	0	0	1	0	0	0	1	1	0	0	1	1	1	1	0	0	1	1
1	0	1	1	0	0	0	1	0	1	1	0	0	1	0	0	0	1	1	0	0	1	1	1	1	0	0	1	1
0	1	1	1	0	0	0	1	1	1	1	0	0	1	0	1	0	1	1	0	0	1	1	1	1	0	0	1	1
1	1	1	1	0	0	0	1	1	1	1	0	0	1	0	1	0	1	1	0	0	1	1	1	1	0	0	1	1
0	0	0	0	1	0	0	0	0	0	0	0	0	1	0	0	0	1	1	0	0	0	1	1	1	0	0	0	1
1	0	0	0	1	0	0	1	0	0	0	0	0	1	0	0	0	1	1	0	0	0	1	1	1	0	0	0	1
0	1	0	0	1	0	0	0	1	0	0	0	0	1	0	1	0	1	1	0	0	0	1	1	1	0	0	0	1
1	1	0	0	1	0	0	1	1	0	0	0	0	1	0	1	0	1	1	0	0	0	1	1	1	0	0	0	1
0	0	1	0	1	0	0	0	0	1	0	0	0	1	0	0	0	1	1	0	0	0	1	1	1	0	0	0	1
1	0	1	0	1	0	0	1	0	1	0	0	0	1	0	0	0	1	1	0	0	0	1	1	1	0	0	0	1
0	1	1	0	1	0	0	0	1	1	0	0	0	1	0	1	0	1	1	0	0	0	1	1	1	0	0	0	1
1	1	1	0	1	0	0	1	1	1	0	0	0	1	0	1	0	1	1	0	0	0	1	1	1	0	0	0	1
0	0	0	0	0	0	1	0	0	0	0	0	0	1	0	0	0	1	1	0	0	0	1	1	1	0	0	0	1
1	0	0	0	0	0	1	1	0	0	0	0	0	1	0	0	0	1	1	0	0	0	1	1	1	0	0	0	1
0	1	0	0	0	0	1	0	1	0	0	0	0	1	0	1	0	1	1	0	0	0	1	1	1	0	0	0	1
1	1	0	0	0	0	1	1	1	0	0	0	0	1	0	1	0	1	1	0	0	0	1	1	1	0	0	0	1
0	0	1	0	0	0	1	0	0	1	0	0	0	1	0	0	0	1	1	0	0	0	1	1	1	0	0	0	1
1	0	1	0	0	0	1	1	0	1	0	0	0	1	0	0	0	1	1	0	0	0	1	1	1	0	0	0	1
0	1	1	0	0	0	1	0	1	1	0	0	0	1	0	1	0	1	1	0	0	0	1	1	1	0	0	0	1
1	1	1	0	0	0	1	1	1	1	0	0	0	1	0	1	0	1	1	0	0	0	1	1	1	0	0	0	1
0	0	0	1	0	0	1	1	0	0	1	0	0	1	0	0	0	1	1	0	0	1	1	1	1	0	0	1	1
1	0	0	1	0	0	1	1	0	0	1	0	0	1	0	0	0	1	1	0	0	1	1	1	1	0	0	1	1
0	1	0	1	0	0	1	1	1	0	1	0	0	1	0	1	0	1	1	0	0	1	1	1	1	0	0	1	1
1	1	0	1	0	0	1	1	1	0	1	0	0	1	0	1	0	1	1	0	0	1	1	1	1	0	0	1	1
0	0	1	1	0	0	1	1	0	1	1	0	0	1	0	0	0	1	1	0	0	1	1	1	1	0	0	1	1
1	0	1	1	0	0	1	1	0	1	1	0	0	1	0	0	0	1	1	0	0	1	1	1	1	0	0	1	1
0	1	1	1	0	0	1	1	1	1	1	0	0	1	0	1	0	1	1	0	0	1	1	1	1	0	0	1	1
1	1	1	1	0	0	1	1	1	1	1	0	0	1	0	1	0	1	1	0	0	1	1	1	1	0	0	1	1
0	0	0	0	1	0	1	0	0	0	0	0	0	1	0	0	0	1	1	0	0	0	1	1	1	0	0	0	1
1	0	0	0	1	0	1	1	0	0	0	0	0	1	0	0	0	1	1	0	0	0	1	1	1	0	0	0	1
0	1	0	0	1	0	1	0	1	0	0	0	0	1	0	1	0	1	1	0	0	0	1	1	1	0	0	0	1
1	1	0	0	1	0	1	1	1	0	0	0	0	1	0	1	0	1	1	0	0	0	1	1	1	0	0	0	1
0	0	1	0	1	0	1	0	0	1	0	0	0	1	0	0	0	1	1	0	0	0	1	1	1	0	0	0	1
1	0	1	0	1	0	1	1	0	1	0	0	0	1	0	0	0	1	1	0	0	0	1	1	1	0	0	0	1
0	1	1	0	1	0	1	0	1	1	0	0	0	1	0	1	0	1	1	0	0	0	1	1	1	0	0	0	1
1	1	1	0	1	0	1	1	1	1	0	0	0	1	0	1	0	1	1	0	0	0	1	1	1	0	0	0	1
0	0	0	0	0	0	0	0	0	0	0	0	0	1	0	0	0	0	0	1	1	0	0	0	0	1	0	0	1
1	0	0	0	0	0	0	1	0	0	0	0	0	1	0	0	0	0	0	1	1	0	0	0	0	1	0	0	1
0	1	0	0	0	0	0	0	1	0	0	0	0	1	0	0	0	0	0	1	1	0	0	0	0	1	0	0	1
1	1	0	0	0	0	0	1	1	0	0	0	0	1	0	0	0	0	0	1	1	0	0	0	0	1	0	0	1
0	0	1	0	0	0	0	0	0	1	0	0	0	1	0	0	0	0	0	1	1	0	0	0	0	1	0	0	1
1	0	1	0	0	0	0	1	0	1	0	0	0	1	0	0	0	0	0	1	1	0	0	0	0	1	0	0	1
0	1	1	0	0	0	0	0	1	1	0	0	0	1	0	0	0	0	0	1	1	0	0	0	0	1	0	0	1
1	1	1	0	0	0	0	1	1	1	0	0	0	1	0	0	0	0	0	1	1	0	0	0	0	1	0	0	1
0	0	0	1	0	0	0	1	0	0	1	0	0	1	0	0	0	0	0	1	1	1	0	0	0	1	0	1	1
1	0	0	1	0	0	0	1	0	0	1	0	0	1	0	0	0	0	0	1	1	1	0	0	0	1	0	1	1
0	1	0	1	0	0	0	1	1	0	1	0	0	1	0	0	0	0	0	1	1	1	0	0	0	1	0	1	1
1	1	0	1	0	0	0	1	1	0	1	0	0	1	0	0	0	0	0	1	1	1	0	0	0	1	0	1	1
0	0	1	1	0	0	0	1	0	1	1	0	0	1	0	0	0	0	0	1	1	1	0	0	0	1	0	1	1
1	0	1	1	0	0	0	1	0	1	1	0	0	1	0	0	0	0	0	1	1	1	0	0	0	1	0	1	1
0	1	1	1	0	0	0	1	1	1	1	0	0	1	0	0	0	0	0	1	1	1	0	0	0	1	0	1	1
1	1	1	1	0	0	0	1	1	1	1	0	0	1	0	0	0	0	0	1	1	1	0	0	0	1	0	1	1
0	0	0	0	1	0	0	0	0	0	0	0	0	1	0	0	0	0	0	1	1	0	0	0	0	1	0	0	1
1	0	0	0	1	0	0	1	0	0	0	0	0	1	0	0	0	0	0	1	1	0	0	0	0	1	0	0	1
0	1	0	0	1	0	0	0	1	0	0	0	0	1	0	0	0	0	0	1	1	0	0	0	0	1	0	0	1
1	1	0	0	1	0	0	1	1	0	0	0	0	1	0	0	0	0	0	1	1	0	0	0	0	1	0	0	1
0	0	1	0	1	0	0	0	0	1	0	0	0	1	0	0	0	0	0	1	1	0	0	0	0	1	0	0	1
1	0	1	0	1	0	0	1	0	1	0	0	0	1	0	0	0	0	0	1	1	0	0	0	0	1	0	0	1
0	1	1	0	1	0	0	0	1	1	0	0	0	1	0	0	0	0	0	1	1	0	0	0	0	1	0	0	1
1	1	1	0	1	0	0	1	1	1	0	0	0	1	0	0	0	0	0	1	1	0	0	0	0	1	0	0	1
0	0	0	1	1	0	0	0	0	0	0	1	0	1	0	0	0	0	0	1	0	0	1	0	0	1	0	0	1
1	0	0	1	1	0	0	1	0	0	0	1	0	1	1	0	0	0	0	1	0	0	1	0	0	1	0	0	1
0	1	0	1	1	0	0	0	1	0	0	1	0	1	0	0	0	0	0	1	0	0	1	0	0	1	0	0	1
1	1	0	1	1	0	0	1	1	0	0	1	0	1	1	0	0	0	0	1	0	0	1	0	0	1	0	0	1
0	0	1	1	1	0	0	0	0	1	0	1	0	1	0	0	0	0	0	1	0	0	1	0	0	1	0	0	1
1	0	1	1	1	0	0	1	0	1	0	1	0	1	1	0	0	0	0	1	0	0	1	0	0	1	0	0	1
0	1	1	1	1	0	0	0	1	1	0	1	0	1	0	0	0	0	0	1	0	0	1	0	0	1	0	0	1
1	1	1	1	1	0	0	1	1	1	0	1	0	1	1	0	0	0	0	1	0	0	1	0	0	1	0	0	1
0	0	0	0	0	0	1	0	0	0	0	0	0	1	0	0	0	0	0	1	1	0	0	0	0	1	0	0	1
1	0	0	0	0	0	1	1	0	0	0	0	0	1	0	0	0	0	0	1	1	0	0	0	0	1	0	0	1
0	1	0	0	0	0	1	0	1	0	0	0	0	1	0	0	0	0	0	1	1	0	0	0	0	1	0	0	1
1	1	0	0	0	0	1	1	1	0	0	0	0	1	0	0	0	0	0	1	1	0	0	0	0	1	0	0	1
0	0	1	0	0	0	1	0	0	1	0	0	0	1	0	0	0	0	0	1	1	0	0	0	0	1	0	0	1
1	0	1	0	0	0	1	1	0	1	0	0	0	1	0	0	0	0	0	1	1	0	0	0	0	1	0	0	1
0	1	1	0	0	0	1	0	1	1	0	0	0	1	0	0	0	0	0	1	1	0	0	0	0	1	0	0	1
1	1	1	0	0	0	1	1	1	1	0	0	0	1	0	0	0	0	0	1	1	0	0	0	0	1	0	0	1
0	0	0	1	0	0	1	1	0	0	1	0	0	1	0	0	0	0	0	1	1	1	0	0	0	1	0	1	1
1	0	0	1	0	0	1	1	0	0	1	0	0	1	0	0	0	0	0	1	1	1	0	0	0	1	0	1	1
0	1	0	1	0	0	1	1	1	0	1	0	0	1	0	0	0	0	0	1	1	1	0	0	0	1	0	1	1
1	1	0	1	0	0	1	1	1	0	1	0	0	1	0	0	0	0	0	1	1	1	0	0	0	1	0	1	1
0	0	1	1	0	0	1	1	0	1	1	0	0	1	0	0	0	0	0	1	1	1	0	0	0	1	0	1	1
1	0	1	1	0	0	1	1	0	1	1	0	0	1	0	0	0	0	0	1	1	1	0	0	0	1	0	1	1
0	1	1	1	0	0	1	1	1	1	1	0	0	1	0	0	0	0	0	1	1	1	0	0	0	1	0	1	1
1	1	1	1	0	0	1	1	1	1	1	0	0	1	0	0	0	0	0	1	1	1	0	0	0	1	0	1	1
0	0	0	0	1	0	1	0	0	0	0	0	0	1	0	0	0	0	0	1	1	0	0	0	0	1	0	0	1
1	0	0	0	1	0	1	1	0	0	0	0	0	1	0	0	0	0	0	1	1	0	0	0	0	1	0	0	1
0	1	0	0	1	0	1	0	1	0	0	0	0	1	0	0	0	0	0	1	1	0	0	0	0	1	0	0	1
1	1	0	0	1	0	1	1	1	0	0	0	0	1	0	0	0	0	0	1	1	0	0	0	0	1	0	0	1
0	0	1	0	1	0	1	0	0	1	0	0	0	1	0	0	0	0	0	1	1	0	0	0	0	1	0	0	1
1	0	1	0	1	0	1	1	0	1	0	0	0	1	0	0	0	0	0	1	1	0	0	0	0	1	0	0	1
0	1	1	0	1	0	1	0	1	1	0	0	0	1	0	0	0	0	0	1	1	0	0	0	0	1	0	0	1
1	1	1	0	1	0	1	1	1	1	0	0	0	1	0	0	0	0	0	1	1	0	0	0	0	1	0	0	1
0	0	0	1	1	0	1	0	0	0	0	1	0	1	0	0	0	0	0	1	0	0	1	0	0	1	0	0	1
1	0	0	1	1	0	1	1	0	0	0	1	0	1	1	0	0	0	0	1	0	0	1	0	0	1	0	0	1
0	1	0	1	1	0	1	0	1	0	0	1	0	1	0	0	0	0	0	1	0	0	1	0	0	1	0	0	1
1	1	0	1	1	0	1	1	1	0	0	1	0	1	1	0	0	0	0	1	0	0	1	0	0	1	0	0	1
0	0	1	1	1	0	1	0	0	1	0	1	0	1	0	0	0	0	0	1	0	0	1	0	0	1	0	0	1
1	0	1	1	1	0	1	1	0	1	0	1	0	1	1	0	0	0	0	1	0	0	1	0	0	1	0	0	1
0	1	1	1	1	0	1	0	1	1	0	1	0	1	0	0	0	0	0	1	0	0	1	0	0	1	0	0	1
1	1	1	1	1	0	1	1	1	1	0	1	0	1	1	0	0	0	0	1	0	0	1	0	0	1	0	0	1
0	0	0	0	0	0	0	0	0	0	0	0	0	1	0	0	0	0	0	1	1	0	1	0	0	1	0	0	1
1	0	0	0	0	0	0	1	0	0	0	0	0	1	0	0	0	0	0	1	1	0	1	0	0	1	0	0	1
0	1	0	0	0	0	0	0	1	0	0	0	0	1	0	0	0	0	0	1	1	0	1	0	0	1	0	0	1
1	1	0	0	0	0	0	1	1	0	0	0	0	1	0	0	0	0	0	1	1	0	1	0	0	1	0	0	1
0	0	1	0	0	0	0	0	0	1	0	0	0	1	0	0	0	0	0	1	1	0	1	0	0	1	0	0	1
1	0	1	0	0	0	0	1	0	1	0	0	0	1	0	0	0	0	0	1	1	0	1	0	0	1	0	0	1
0	1	1	0	0	0	0	0	1	1	0	0	0	1	0	0	0	0	0	1	1	0	1	0	0	1	0	0	1
1	1	1	0	0	0	0	1	1	1	0	0	0	1	0	0	0	0	0	1	1	0	1	0	0	1	0	0	1
0	0	0	1	0	0	0	1	0	0	1	0	0	1	0	0	0	0	0	1	1	1	1	0	0	1	0	1	1
1	0	0	1	0	0	0	1	0	0	1	0	0	1	0	0	0	0	0	1	1	1	1	0	0	1	0	1	1
0	1	0	1	0	0	0	1	1	0	1	0	0	1	0	0	0	0	0	1	1	1	1	0	0	1	0	1	1
1	1	0	1	0	0	0	1	1	0	1	0	0	1	0	0	0	0	0	1	1	1	1	0	0	1	0	1	1
0	0	1	1	0	0	0	1	0	1	1	0	0	1	0	0	0	0	0	1	1	1	1	0	0	1	0	1	1
1	0	1	1	0	0	0	1	0	1	1	0	0	1	0	0	0	0	0	1	1	1	1	0	0	1	0	1	1
0	1	1	1	0	0	0	1	1	1	1	0	0	1	0	0	0	0	0	1	1	1	1	0	0	1	0	1	1
1	1	1	1	0	0	0	1	1	1	1	0	0	1	0	0	0	0	0	1	1	1	1	0	0	1	0	1	1
0	0	0	0	1	0	0	0	0	0	0	0	0	1	0	0	0	0	0	1	1	0	1	0	0	1	0	0	1
1	0	0	0	1	0	0	1	0	0	0	0	0	1	0	0	0	0	0	1	1	0	1	0	0	1	0	0	1
0	1	0	0	1	0	0	0	1	0	0	0	0	1	0	0	0	0	0	1	1	0	1	0	0	1	0	0	1
1	1	0	0	1	0	0	1	1	0	0	0	0	1	0	0	0	0	0	1	1	0	1	0	0	1	0	0	1
0	0	1	0	1	0	0	0	0	1	0	0	0	1	0	0	0	0	0	1	1	0	1	0	0	1	0	0	1
1	0	1	0	1	0	0	1	0	1	0	0	0	1	0	0	0	0	0	1	1	0	1	0	0	1	0	0	1
0	1	1	0	1	0	0	0	1	1	0	0	0	1	0	0	0	0	0	1	1	0	1	0	0	1	0	0	1
1	1	1	0	1	0	0	1	1	1	0	0	0	1	0	0	0	0	0	1	1	0	1	0	0	1	0	0	1
0	0	0	0	0	0	1	0	0	0	0	0	0	1	0	0	0	0	0	1	1	0	1	0	0	1	0	0	1
1	0	0	0	0	0	1	1	0	0	0	0	0	1	0	0	0	0	0	1	1	0	1	0	0	1	0	0	1
0	1	0	0	0	0	1	0	1	0	0	0	0	1	0	0	0	0	0	1	1	0	1	0	0	1	0	0	1
1	1	0	0	0	0	1	1	1	0	0	0	0	1	0	0	0	0	0	1	1	0	1	0	0	1	0	0	1
0	0	1	0	0	0	1	0	0	1	0	0	0	1	0	0	0	0	0	1	1	0	1	0	0	1	0	0	1
1	0	1	0	0	0	1	1	0	1	0	0	0	1	0	0	0	0	0	1	1	0	1	0	0	1	0	0	1
0	1	1	0	0	0	1	0	1	1	0	0	0	1	0	0	0	0	0	1	1	0	1	0	0	1	0	0	1
1	1	1	0	0	0	1	1	1	1	0	0	0	1	0	0	0	0	0	1	1	0	1	0	0	1	0	0	1
0	0	0	1	0	0	1	1	0	0	1	0	0	1	0	0	0	0	0	1	1	1	1	0	0	1	0	1	1
1	0	0	1	0	0	1	1	0	0	1	0	0	1	0	0	0	0	0	1	1	1	1	0	0	1	0	1	1
0	1	0	1	0	0	1	1	1	0	1	0	0	1	0	0	0	0	0	1	1	1	1	0	0	1	0	1	1
1	1	0	1	0	0	1	1	1	0	1	0	0	1	0	0	0	0	0	1	1	1	1	0	0	1	0	1	1
0	0	1	1	0	0	1	1	0	1	1	0	0	1	0	0	0	0	0	1	1	1	1	0	0	1	0	1	1
1	0	1	1	0	0	1	1	0	1	1	0	0	1	0	0	0	0	0	1	1	1	1	0	0	1	0	1	1
0	1	1	1	0	0	1	1	1	1	1	0	0	1	0	0	0	0	0	1	1	1	1	0	0	1	0	1	1
1	1	1	1	0	0	1	1	1	1	1	0	0	1	0	0	0	0	0	1	1	1	1	0	0	1	0	1	1
0	0	0	0	1	0	1	0	0	0	0	0	0	1	0	0	0	0	0	1	1	0	1	0	0	1	0	0	1
1	0	0	0	1	0	1	1	0	0	0	0	0	1	0	0	0	0	0	1	1	0	1	0	0	1	0	0	1
0	1	0	0	1	0	1	0	1	0	0	0	0	1	0	0	0	0	0	1	1	0	1	0	0	1	0	0	1
1	1	0	0	1	0	1	1	1	0	0	0	0	1	0	0	0	0	0	1	1	0	1	0	0	1	0	0	1
0	0	1	0	1	0	1	0	0	1	0	0	0	1	0	0	0	0	0	1	1	0	1	0	0	1	0	0	1
1	0	1	0	1	0	1	1	0	1	0	0	0	1	0	0	0	0	0	1	1	0	1	0	0	1	0	0	1
0	1	1	0	1	0	1	0	1	1	0	0	0	1	0	0	0	0	0	1	1	0	1	0	0	1	0	0	1
1	1	1	0	1	0	1	1	1	1	0	0	0	1	0	0	0	0	0	1	1	0	1	0	0	1	0	0	1
0	0	0	0	0	0	0	0	0	0	0	0	0	1	0	0	0	1	0	1	0	0	0	0	0	1	0	0	1
1	0	0	0	0	0	0	1	0	0	0	0	0	1	1	0	0	1	0	1	0	0	0	0	0	1	0	0	1
0	1	0	0	0	0	0	0	1	0	0	0	0	1	0	0	0	1	0	1	0	0	0	0	0	1	0	0	1
1	1	0	0	0	0	0	1	1	0	0	0	0	1	1	0	0	1	0	1	0	0	0	0	0	1	0	0	1
0	0	1	0	0	0	0	0	0	1	0	0	0	1	0	0	0	1	0	1	0	0	0	0	0	1	0	0	1
1	0	1	0	0	0	0	1	0	1	0	0	0	1	1	0	0	1	0	1	0	0	0	0	0	1	0	0	1
0	1	1	0	0	0	0	0	1	1	0	0	0	1	0	0	0	1	0	1	0	0	0	0	0	1	0	0	1
1	1	1	0	0	0	0	1	1	1	0	0	0	1	1	0	0	1	0	1	0	0	0	0	0	1	0	0	1
0	0	0	1	0	0	0	1	0	0	1	0	0	1	1	0	0	1	0	1	0	1	0	0	0	1	0	1	1
1	0	0	1	0	0	0	1	0	0	1	0	0	1	1	0	0	1	0	1	0	1	0	0	0	1	0	1	1
0	1	0	1	0	0	0	1	1	0	1	0	0	1	1	0	0	1	0	1	0	1	0	0	0	1	0	1	1
1	1	0	1	0	0	0	1	1	0	1	0	0	1	1	0	0	1	0	1	0	1	0	0	0	1	0	1	1
0	0	1	1	0	0	0	1	0	1	1	0	0	1	1	0	0	1	0	1	0	1	0	0	0	1	0	1	1
1	0	1	1	0	0	0	1	0	1	1	0	0	1	1	0	0	1	0	1	0	1	0	0	0	1	0	1	1
0	1	1	1	0	0	0	1	1	1	1	0	0	1	1	0	0	1	0	1	0	1	0	0	0	1	0	1	1
1	1	1	1	0	0	0	1	1	1	1	0	0	1	1	0	0	1	0	1	0	1	0	0	0	1	0	1	1
0	0	0	0	1	0	0	0	0	0	0	0	0	1	0	0	0	1	0	1	0	0	0	0	0	1	0	0	1
1	0	0	0	1	0	0	1	0	0	0	0	0	1	1	0	0	1	0	1	0	0	0	0	0	1	0	0	1
0	1	0	0	1	0	0	0	1	0	0	0	0	1	0	0	0	1	0	1	0	0	0	0	0	1	0	0	1
1	1	0	0	1	0	0	1	1	0	0	0	0	1	1	0	0	1	0	1	0	0	0	0	0	1	0	0	1
0	0	1	0	1	0	0	0	0	1	0	0	0	1	0	0	0	1	0	1	0	0	0	0	0	1	0	0	1
1	0	1	0	1	0	0	1	0	1	0	0	0	1	1	0	0	1	0	1	0	0	0	0	0	1	0	0	1
0	1	1	0	1	0	0	0	1	1	0	0	0	1	0	0	0	1	0	1	0	0	0	0	0	1	0	0	1
1	1	1	0	1	0	0	1	1	1	0	0	0	1	1	0	0	1	0	1	0	0	0	0	0	1	0	0	1
0	0	0	1	1	0	0	0	0	0	0	1	0	1	0	0	0	1	0	1	0	0	1	0	0	1	0	0	1
1	0	0	1	1	0	0	1	0	0	0	1	0	1	1	0	0	1	0	1	0	0	1	0	0	1	0	0	1
0	1	0	1	1	0	0	0	1	0	0	1	0	1	0	0	0	1	0	1	0	0	1	0	0	1	0	0	1
1	1	0	1	1	0	0	1	1	0	0	1	0	1	1	0	0	1	0	1	0	0	1	0	0	1	0	0	1
0	0	1	1	1	0	0	0	0	1	0	1	0	1	0	0	0	1	0	1	0	0	1	0	0	1	0	0	1
1	0	1	1	1	0	0	1	0	1	0	1	0	1	1	0	0	1	0	1	0	0	1	0	0	1	0	0	1
0	1	1	1	1	0	0	0	1	1	0	1	0	1	0	0	0	1	0	1	0	0	1	0	0	1	0	0	1
1	1	1	1	1	0	0	1	1	1	0	1	0	1	1	0	0	1	0	1	0	0	1	0	0	1	0	0	1
0	0	0	0	0	0	1	0	0	0	0	0	0	1	0	0	0	1	0	1	0	0	0	0	0	1	0	0	1
1	0	0	0	0	0	1	1	0	0	0	0	0	1	1	0	0	1	0	1	0	0	0	0	0	1	0	0	1
0	1	0	0	0	0	1	0	1	0	0	0	0	1	0	0	0	1	0	1	0	0	0	0	0	1	0	0	1
1	1	0	0	0	0	1	1	1	0	0	0	0	1	1	0	0	1	0	1	0	0	0	0	0	1	0	0	1
0	0	1	0	0	0	1	0	0	1	0	0	0	1	0	0	0	1	0	1	0	0	0	0	0	1	0	0	1
1	0	1	0	0	0	1	1	0	1	0	0	0	1	1	0	0	1	0	1	0	0	0	0	0	1	0	0	1
0	1	1	0	0	0	1	0	1	1	0	0	0	1	0	0	0	1	0	1	0	0	0	0	0	1	0	0	1
1	1	1	0	0	0	1	1	1	1	0	0	0	1	1	0	0	1	0	1	0	0	0	0	0	1	0	0	1
0	0	0	1	0	0	1	1	0	0	1	0	0	1	1	0	0	1	0	1	0	1	0	0	0	1	0	1	1
1	0	0	1	0	0	1	1	0	0	1	0	0	1	1	0	0	1	0	1	0	1	0	0	0	1	0	1	1
0	1	0	1	0	0	1	1	1	0	1	0	0	1	1	0	0	1	0	1	0	1	0	0	0	1	0	1	1
1	1	0	1	0	0	1	1	1	0	1	0	0	1	1	0	0	1	0	1	0	1	0	0	0	1	0	1	1
0	0	1	1	0	0	1	1	0	1	1	0	0	1	1	0	0	1	0	1	0	1	0	0	0	1	0	1	1
1	0	1	1	0	0	1	1	0	1	1	0	0	1	1	0	0	1	0	1	0	1	0	0	0	1	0	1	1
0	1	1	1	0	0	1	1	1	1	1	0	0	1	1	0	0	1	0	1	0	1	0	0	0	1	0	1	1
1	1	1	1	0	0	1	1	1	1	1	0	0	1	1	0	0	1	0	1	0	1	0	0	0	1	0	1	1
0	0	0	0	1	0	1	0	0	0	0	0	0	1	0	0	0	1	0	1	0	0	0	0	0	1	0	0	1
1	0	0	0	1	0	1	1	0	0	0	0	0	1	1	0	0	1	0	1	0	0	0	0	0	1	0	0	1
0	1	0	0	1	0	1	0	1	0	0	0	0	1	0	0	0	1	0	1	0	0	0	0	0	1	0	0	1
1	1	0	0	1	0	1	1	1	0	0	0	0	1	1	0	0	1	0	1	0	0	0	0	0	1	0	0	1
0	0	1	0	1	0	1	0	0	1	0	0	0	1	0	0	0	1	0	1	0	0	0	0	0	1	0	0	1
1	0	1	0	1	0	1	1	0	1	0	0	0	1	1	0	0	1	0	1	0	0	0	0	0	1	0	0	1
0	1	1	0	1	0	1	0	1	1	0	0	0	1	0	0	0	1	0	1	0	0	0	0	0	1	0	0	1
1	1	1	0	1	0	1	1	1	1	0	0	0	1	1	0	0	1	0	1	0	0	0	0	0	1	0	0	1
0	0	0	1	1	0	1	0	0	0	0	1	0	1	0	0	0	1	0	1	0	0	1	0	0	1	0	0	1
1	0	0	1	1	0	1	1	0	0	0	1	0	1	1	0	0	1	0	1	0	0	1	0	0	1	0	0	1
0	1	0	1	1	0	1	0	1	0	0	1	0	1	0	0	0	1	0	1	0	0	1	0	0	1	0	0	1
1	1	0	1	1	0	1	1	1	0	0	1	0	1	1	0	0	1	0	1	0	0	1	0	0	1	0	0	1
0	0	1	1	1	0	1	0	0	1	0	1	0	1	0	0	0	1	0	1	0	0	1	0	0	1	0	0	1
1	0	1	1	1	0	1	1	0	1	0	1	0	1	1	0	0	1	0	1	0	0	1	0	0	1	0	0	1
0	1	1	1	1	0	1	0	1	1	0	1	0	1	0	0	0	1	0	1	0	0	1	0	0	1	0	0	1
1	1	1	1	1	0	1	1	1	1	0	1	0	1	1	0	0	1	0	1	0	0	1	0	0	1	0	0	1
0	0	0	0	0	0	0	0	0	0	0	0	0	1	0	0	0	1	0	1	0	0	1	0	0	1	0	0	1
1	0	0	0	0	0	0	1	0	0	0	0	0	1	1	0	0	1	0	1	0	0	1	0	0	1	0	0	1
0	1	0	0	0	0	0	0	1	0	0	0	0	1	0	0	0	1	0	1	0	0	1	0	0	1	0	0	1
1	1	0	0	0	0	0	1	1	0	0	0	0	1	1	0	0	1	0	1	0	0	1	0	0	1	0	0	1
0	0	1	0	0	0	0	0	0	1	0	0	0	1	0	0	0	1	0	1	0	0	1	0	0	1	0	0	1
1	0	1	0	0	0	0	1	0	1	0	0	0	1	1	0	0	1	0	1	0	0	1	0	0	1	0	0	1
0	1	1	0	0	0	0	0	1	1	0	0	0	1	0	0	0	1	0	1	0	0	1	0	0	1	0	0	1
1	1	1	0	0	0	0	1	1	1	0	0	0	1	1	0	0	1	0	1	0	0	1	0	0	1	0	0	1
0	0	0	1	0	0	0	1	0	0	1	0	0	1	1	0	0	1	0	1	0	1	1	0	0	1	0	1	1
1	0	0	1	0	0	0	1	0	0	1	0	0	1	1	0	0	1	0	1	0	1	1	0	0	1	0	1	1
0	1	0	1	0	0	0	1	1	0	1	0	0	1	1	0	0	1	0	1	0	1	1	0	0	1	0	1	1
1	1	0	1	0	0	0	1	1	0	1	0	0	1	1	0	0	1	0	1	0	1	1	0	0	1	0	1	1
0	0	1	1	0	0	0	1	0	1	1	0	0	1	1	0	0	1	0	1	0	1	1	0	0	1	0	1	1
1	0	1	1	0	0	0	1	0	1	1	0	0	1	1	0	0	1	0	1	0	1	1	0	0	1	0	1	1
0	1	1	1	0	0	0	1	1	1	1	0	0	1	1	0	0	1	0	1	0	1	1	0	0	1	0	1	1
1	1	1	1	0	0	0	1	1	1	1	0	0	1	1	0	0	1	0	1	0	1	1	0	0	1	0	1	1
0	0	0	0	1	0	0	0	0	0	0	0	0	1	0	0	0	1	0	1	0	0	1	0	0	1	0	0	1
1	0	0	0	1	0	0	1	0	0	0	0	0	1	1	0	0	1	0	1	0	0	1	0	0	1	0	0	1
0	1	0	0	1	0	0	0	1	0	0	0	0	1	0	0	0	1	0	1	0	0	1	0	0	1	0	0	1
1	1	0	0	1	0	0	1	1	0	0	0	0	1	1	0	0	1	0	1	0	0	1	0	0	1	0	0	1
0	0	1	0	1	0	0	0	0	1	0	0	0	1	0	0	0	1	0	1	0	0	1	0	0	1	0	0	1
1	0	1	0	1	0	0	1	0	1	0	0	0	1	1	0	0	1	0	1	0	0	1	0	0	1	0	0	1
0	1	1	0	1	0	0	0	1	1	0	0	0	1	0	0	0	1	0	1	0	0	1	0	0	1	0	0	1
1	1	1	0	1	0	0	1	1	1	0	0	0	1	1	0	0	1	0	1	0	0	1	0	0	1	0	0	1
0	0	0	0	0	0	1	0	0	0	0	0	0	1	0	0	0	1	0	1	0	0	1	0	0	1	0	0	1
1	0	0	0	0	0	1	1	0	0	0	0	0	1	1	0	0	1	0	1	0	0	1	0	0	1	0	0	1
0	1	0	0	0	0	1	0	1	0	0	0	0	1	0	0	0	1	0	1	0	0	1	0	0	1	0	0	1
1	1	0	0	0	0	1	1	1	0	0	0	0	1	1	0	0	1	0	1	0	0	1	0	0	1	0	0	1
0	0	1	0	0	0	1	0	0	1	0	0	0	1	0	0	0	1	0	1	0	0	1	0	0	1	0	0	1
1	0	1	0	0	0	1	1	0	1	0	0	0	1	1	0	0	1	0	1	0	0	1	0	0	1	0	0	1
0	1	1	0	0	0	1	0	1	1	0	0	0	1	0	0	0	1	0	1	0	0	1	0	0	1	0	0	1
1	1	1	0	0	0	1	1	1	1	0	0	0	1	1	0	0	1	0	1	0	0	1	0	0	1	0	0	1
0	0	0	1	0	0	1	1	0	0	1	0	0	1	1	0	0	1	0	1	0	1	1	0	0	1	0	1	1
1	0	0	1	0	0	1	1	0	0	1	0	0	1	1	0	0	1	0	1	0	1	1	0	0	1	0	1	1
0	1	0	1	0	0	1	1	1	0	1	0	0	1	1	0	0	1	0	1	0	1	1	0	0	1	0	1	1
1	1	0	1	0	0	1	1	1	0	1	0	0	1	1	0	0	1	0	1	0	1	1	0	0	1	0	1	1
0	0	1	1	0	0	1	1	0	1	1	0	0	1	1	0	0	1	0	1	0	1	1	0	0	1	0	1	1
1	0	1	1	0	0	1	1	0	1	1	0	0	1	1	0	0	1	0	1	0	1	1	0	0	1	0	1	1
0	1	1	1	0	0	1	1	1	1	1	0	0	1	1	0	0	1	0	1	0	1	1	0	0	1	0	1	1
1	1	1	1	0	0	1	1	1	1	1	0	0	1	1	0	0	1	0	1	0	1	1	0	0	1	0	1	1
0	0	0	0	1	0	1	0	0	0	0	0	0	1	0	0	0	1	0	1	0	0	1	0	0	1	0	0	1
1	0	0	0	1	0	1	1	0	0	0	0	0	1	1	0	0	1	0	1	0	0	1	0	0	1	0	0	1
0	1	0	0	1	0	1	0	1	0	0	0	0	1	0	0	0	1	0	1	0	0	1	0	0	1	0	0	1
1	1	0	0	1	0	1	1	1	0	0	0	0	1	1	0	0	1	0	1	0	0	1	0	0	1	0	0	1
0	0	1	0	1	0	1	0	0	1	0	0	0	1	0	0	0	1	0	1	0	0	1	0	0	1	0	0	1
1	0	1	0	1	0	1	1	0	1	0	0	0	1	1	0	0	1	0	1	0	0	1	0	0	1	0	0	1
0	1	1	0	1	0	1	0	1	1	0	0	0	1	0	0	0	1	0	1	0	0	1	0	0	1	0	0	1
1	1	1	0	1	0	1	1	1	1	0	0	0	1	1	0	0	1	0	1	0	0	1	0	0	1	0	0	1
0	0	0	0	0	0	0	0	0	0	0	0	0	1	0	0	0	0	1	1	1	0	0	1	1	1	0	0	1
1	0	0	0	0	0	0	1	0	0	0	0	0	1	0	0	0	0	1	1	1	0	0	1	1	1	0	0	1
0	1	0	0	0	0	0	0	1	0	0	0	0	1	0	0	0	0	1	1	1	0	0	1	1	1	0	0	1
1	1	0	0	0	0	0	1	1	0	0	0	0	1	0	0	0	0	1	1	1	0	0	1	1	1	0	0	1
0	0	1	0	0	0	0	0	0	1	0	0	0	1	0	0	0	0	1	1	1	0	0	1	1	1	0	0	1
1	0	1	0	0	0	0	1	0	1	0	0	0	1	0	0	0	0	1	1	1	0	0	1	1	1	0	0	1
0	1	1	0	0	0	0	0	1	1	0	0	0	1	0	0	0	0	1	1	1	0	0	1	1	1	0	0	1
1	1	1	0	0	0	0	1	1	1	0	0	0	1	0	0	0	0	1	1	1	0	0	1	1	1	0	0	1
0	0	0	1	0	0	0	1	0	0	1	0	0	1	0	0	0	0	1	1	1	1	0	1	1	1	0	1	1
1	0	0	1	0	0	0	1	0	0	1	0	0	1	0	0	0	0	1	1	1	1	0	1	1	1	0	1	1
0	1	0	1	0	0	0	1	1	0	1	0	0	1	0	0	0	0	1	1	1	1	0	1	1	1	0	1	1
1	1	0	1	0	0	0	1	1	0	1	0	0	1	0	0	0	0	1	1	1	1	0	1	1	1	0	1	1
0	0	1	1	0	0	0	1	0	1	1	0	0	1	0	0	0	0	1	1	1	1	0	1	1	1	0	1	1
1	0	1	1	0	0	0	1	0	1	1	0	0	1	0	0	0	0	1	1	1	1	0	1	1	1	0	1	1
0	1	1	1	0	0	0	1	1	1	1	0	0	1	0	0	0	0	1	1	1	1	0	1	1	1	0	1	1
1	1	1	1	0	0	0	1	1	1	1	0	0	1	0	0	0	0	1	1	1	1	0	1	1	1	0	1	1
0	0	0	0	1	0	0	0	0	0	0	0	0	1	0	0	0	0	1	1	1	0	0	1	1	1	0	0	1
1	0	0	0	1	0	0	1	0	0	0	0	0	1	0	0	0	0	1	1	1	0	0	1	1	1	0	0	1
0	1	0	0	1	0	0	0	1	0	0	0	0	1	0	0	0	0	1	1	1	0	0	1	1	1	0	0	1
1	1	0	0	1	0	0	1	1	0	0	0	0	1	0	0	0	0	1	1	1	0	0	1	1	1	0	0	1
0	0	1	0	1	0	0	0	0	1	0	0	0	1	0	0	0	0	1	1	1	0	0	1	1	1	0	0	1
1	0	1	0	1	0	0	1	0	1	0	0	0	1	0	0	0	0	1	1	1	0	0	1	1	1	0	0	1
0	1	1	0	1	0	0	0	1	1	0	0	0	1	0	0	0	0	1	1	1	0	0	1	1	1	0	0	1
1	1	1	0	1	0	0	1	1	1	0	0	0	1	0	0	0	0	1	1	1	0	0	1	1	1	0	0	1
0	0	0	1	1	0	0	0	0	0	0	1	0	1	0	0	0	0	1	1	0	0	1	1	1	1	0	0	1
1	0	0	1	1	0	0	1	0	0	0	1	0	1	0	0	0	0	1	1	0	0	1	1	1	1	0	0	1
0	1	0	1	1	0	0	0	1	0	0	1	0	1	0	0	0	0	1	1	0	0	1	1	1	1	0	0	1
1	1	0	1	1	0	0	1	1	0	0	1	0	1	0	0	0	0	1	1	0	0	1	1	1	1	0	0	1
0	0	1	1	1	0	0	0	0	1	0	1	0	1	0	0	0	0	1	1	0	0	1	1	1	1	0	0	1
1	0	1	1	1	0	0	1	0	1	0	1	0	1	0	0	0	0	1	1	0	0	1	1	1	1	0	0	1
0	1	1	1	1	0	0	0	1	1	0	1	0	1	0	0	0	0	1	1	0	0	1	1	1	1	0	0	1
1	1	1	1	1	0	0	1	1	1	0	1	0	1	0	0	0	0	1	1	0	0	1	1	1	1	0	0	1
0	0	0	0	0	0	1	0	0	0	0	0	0	1	0	0	0	0	1	1	1	0	0	1	1	1	0	0	1
1	0	0	0	0	0	1	1	0	0	0	0	0	1	0	0	0	0	1	1	1	0	0	1	1	1	0	0	1
0	1	0	0	0	0	1	0	1	0	0	0	0	1	0	0	0	0	1	1	1	0	0	1	1	1	0	0	1
1	1	0	0	0	0	1	1	1	0	0	0	0	1	0	0	0	0	1	1	1	0	0	1	1	1	0	0	1
0	0	1	0	0	0	1	0	0	1	0	0	0	1	0	0	0	0	1	1	1	0	0	1	1	1	0	0	1
1	0	1	0	0	0	1	1	0	1	0	0	0	1	0	0	0	0	1	1	1	0	0	1	1	1	0	0	1
0	1	1	0	0	0	1	0	1	1	0	0	0	1	0	0	0	0	1	1	1	0	0	1	1	1	0	0	1
1	1	1	0	0	0	1	1	1	1	0	0	0	1	0	0	0	0	1	1	1	0	0	1	1	1	0	0	1
0	0	0	1	0	0	1	1	0	0	1	0	0	1	0	0	0	0	1	1	1	1	0	1	1	1	0	1	1
1	0	0	1	0	0	1	1	0	0	1	0	0	1	0	0	0	0	1	1	1	1	0	1	1	1	0	1	1
0	1	0	1	0	0	1	1	1	0	1	0	0	1	0	0	0	0	1	1	1	1	0	1	1	1	0	1	1
1	1	0	1	0	0	1	1	1	0	1	0	0	1	0	0	0	0	1	1	1	1	0	1	1	1	0	1	1
0	0	1	1	0	0	1	1	0	1	1	0	0	1	0	0	0	0	1	1	1	1	0	1	1	1	0	1	1
1	0	1	1	0	0	1	1	0	1	1	0	0	1	0	0	0	0	1	1	1	1	0	1	1	1	0	1	1
0	1	1	1	0	0	1	1	1	1	1	0	0	1	0	0	0	0	1	1	1	1	0	1	1	1	0	1	1
1	1	1	1	0	0	1	1	1	1	1	0	0	1	0	0	0	0	1	1	1	1	0	1	1	1	0	1	1
0	0	0	0	1	0	1	0	0	0	0	0	0	1	0	0	0	0	1	1	1	0	0	1	1	1	0	0	1
1	0	0	0	1	0	1	1	0	0	0	0	0	1	0	0	0	0	1	1	1	0	0	1	1	1	0	0	1
0	1	0	0	1	0	1	0	1	0	0	0	0	1	0	0	0	0	1	1	1	0	0	1	1	1	0	0	1
1	1	0	0	1	0	1	1	1	0	0	0	0	1	0	0	0	0	1	1	1	0	0	1	1	1	0	0	1
0	0	1	0	1	0	1	0	0	1	0	0	0	1	0	0	0	0	1	1	1	0	0	1	1	1	0	0	1
1	0	1	0	1	0	1	1	0	1	0	0	0	1	0	0	0	0	1	1	1	0	0	1	1	1	0	0	1
0	1	1	0	1	0	1	0	1	1	0	0	0	1	0	0	0	0	1	1	1	0	0	1	1	1	0	0	1
1	1	1	0	1	0	1	1	1	1	0	0	0	1	0	0	0	0	1	1	1	0	0	1	1	1	0	0	1
0	0	0	1	1	0	1	0	0	0	0	1	0	1	0	0	0	0	1	1	0	0	1	1	1	1	0	0	1
1	0	0	1	1	0	1	1	0	0	0	1	0	1	0	0	0	0	1	1	0	0	1	1	1	1	0	0	1
0	1	0	1	1	0	1	0	1	0	0	1	0	1	0	0	0	0	1	1	0	0	1	1	1	1	0	0	1
1	1	0	1	1	0	1	1	1	0	0	1	0	1	0	0	0	0	1	1	0	0	1	1	1	1	0	0	1
0	0	1	1	1	0	1	0	0	1	0	1	0	1	0	0	0	0	1	1	0	0	1	1	1	1	0	0	1
1	0	1	1	1	0	1	1	0	1	0	1	0	1	0	0	0	0	1	1	0	0	1	1	1	1	0	0	1
0	1	1	1	1	0	1	0	1	1	0	1	0	1	0	0	0	0	1	1	0	0	1	1	1	1	0	0	1
1	1	1	1	1	0	1	1	1	1	0	1	0	1	0	0	0	0	1	1	0	0	1	1	1	1	0	0	1
0	0	0	0	0	0	0	0	0	0	0	0	0	1	0	0	0	0	1	1	1	0	1	1	1	1	0	0	1
1	0	0	0	0	0	0	1	0	0	0	0	0	1	0	0	0	0	1	1	1	0	1	1	1	1	0	0	1
0	1	0	0	0	0	0	0	1	0	0	0	0	1	0	0	0	0	1	1	1	0	1	1	1	1	0	0	1
1	1	0	0	0	0	0	1	1	0	0	0	0	1	0	0	0	0	1	1	1	0	1	1	1	1	0	0	1
0	0	1	0	0	0	0	0	0	1	0	0	0	1	0	0	0	0	1	1	1	0	1	1	1	1	0	0	1
1	0	1	0	0	0	0	1	0	1	0	0	0	1	0	0	0	0	1	1	1	0	1	1	1	1	0	0	1
0	1	1	0	0	0	0	0	1	1	0	0	0	1	0	0	0	0	1	1	1	0	1	1	1	1	0	0	1
1	1	1	0	0	0	0	1	1	1	0	0	0	1	0	0	0	0	1	1	1	0	1	1	1	1	0	0	1
0	0	0	1	0	0	0	1	0	0	1	0	0	1	0	0	0	0	1	1	1	1	1	1	1	1	0	1	1
1	0	0	1	0	0	0	1	0	0	1	0	0	1	0	0	0	0	1	1	1	1	1	1	1	1	0	1	1
0	1	0	1	0	0	0	1	1	0	1	0	0	1	0	0	0	0	1	1	1	1	1	1	1	1	0	1	1
1	1	0	1	0	0	0	1	1	0	1	0	0	1	0	0	0	0	1	1	1	1	1	1	1	1	0	1	1
0	0	1	1	0	0	0	1	0	1	1	0	0	1	0	0	0	0	1	1	1	1	1	1	1	1	0	1	1
1	0	1	1	0	0	0	1	0	1	1	0	0	1	0	0	0	0	1	1	1	1	1	1	1	1	0	1	1
0	1	1	1	0	0	0	1	1	1	1	0	0	1	0	0	0	0	1	1	1	1	1	1	1	1	0	1	1
1	1	1	1	0	0	0	1	1	1	1	0	0	1	0	0	0	0	1	1	1	1	1	1	1	1	0	1	1
0	0	0	0	1	0	0	0	0	0	0	0	0	1	0	0	0	0	1	1	1	0	1	1	1	1	0	0	1
1	0	0	0	1	0	0	1	0	0	0	0	0	1	0	0	0	0	1	1	1	0	1	1	1	1	0	0	1
0	1	0	0	1	0	0	0	1	0	0	0	0	1	0	0	0	0	1	1	1	0	1	1	1	1	0	0	1
1	1	0	0	1	0	0	1	1	0	0	0	0	1	0	0	0	0	1	1	1	0	1	1	1	1	0	0	1
0	0	1	0	1	0	0	0	0	1	0	0	0	1	0	0	0	0	1	1	1	0	1	1	1	1	0	0	1
1	0	1	0	1	0	0	1	0	1	0	0	0	1	0	0	0	0	1	1	1	0	1	1	1	1	0	0	1
0	1	1	0	1	0	0	0	1	1	0	0	0	1	0	0	0	0	1	1	1	0	1	1	1	1	0	0	1
1	1	1	0	1	0	0	1	1	1	0	0	0	1	0	0	0	0	1	1	1	0	1	1	1	1	0	0	1
0	0	0	0	0	0	1	0	0	0	0	0	0	1	0	0	0	0	1	1	1	0	1	1	1	1	0	0	1
1	0	0	0	0	0	1	1	0	0	0	0	0	1	0	0	0	0	1	1	1	0	1	1	1	1	0	0	1
0	1	0	0	0	0	1	0	1	0	0	0	0	1	0	0	0	0	1	1	1	0	1	1	1	1	0	0	1
1	1	0	0	0	0	1	1	1	0	0	0	0	1	0	0	0	0	1	1	1	0	1	1	1	1	0	0	1
0	0	1	0	0	0	1	0	0	1	0	0	0	1	0	0	0	0	1	1	1	0	1	1	1	1	0	0	1
1	0	1	0	0	0	1	1	0	1	0	0	0	1	0	0	0	0	1	1	1	0	1	1	1	1	0	0	1
0	1	1	0	0	0	1	0	1	1	0	0	0	1	0	0	0	0	1	1	1	0	1	1	1	1	0	0	1
1	1	1	0	0	0	1	1	1	1	0	0	0	1	0	0	0	0	1	1	1	0	1	1	1	1	0	0	1
0	0	0	1	0	0	1	1	0	0	1	0	0	1	0	0	0	0	1	1	1	1	1	1	1	1	0	1	1
1	0	0	1	0	0	1	1	0	0	1	0	0	1	0	0	0	0	1	1	1	1	1	1	1	1	0	1	1
0	1	0	1	0	0	1	1	1	0	1	0	0	1	0	0	0	0	1	1	1	1	1	1	1	1	0	1	1
1	1	0	1	0	0	1	1	1	0	1	0	0	1	0	0	0	0	1	1	1	1	1	1	1	1	0	1	1
0	0	1	1	0	0	1	1	0	1	1	0	0	1	0	0	0	0	1	1	1	1	1	1	1	1	0	1	1
1	0	1	1	0	0	1	1	0	1	1	0	0	1	0	0	0	0	1	1	1	1	1	1	1	1	0	1	1
0	1	1	1	0	0	1	1	1	1	1	0	0	1	0	0	0	0	1	1	1	1	1	1	1	1	0	1	1
1	1	1	1	0	0	1	1	1	1	1	0	0	1	0	0	0	0	1	1	1	1	1	1	1	1	0	1	1
0	0	0	0	1	0	1	0	0	0	0	0	0	1	0	0	0	0	1	1	1	0	1	1	1	1	0	0	1
1	0	0	0	1	0	1	1	0	0	0	0	0	1	0	0	0	0	1	1	1	0	1	1	1	1	0	0	1
0	1	0	0	1	0	1	0	1	0	0	0	0	1	0	0	0	0	1	1	1	0	1	1	1	1	0	0	1
1	1	0	0	1	0	1	1	1	0	0	0	0	1	0	0	0	0	1	1	1	0	1	1	1	1	0	0	1
0	0	1	0	1	0	1	0	0	1	0	0	0	1	0	0	0	0	1	1	1	0	1	1	1	1	0	0	1
1	0	1	0	1	0	1	1	0	1	0	0	0	1	0	0	0	0	1	1	1	0	1	1	1	1	0	0	1
0	1	1	0	1	0	1	0	1	1	0	0	0	1	0	0	0	0	1	1	1	0	1	1	1	1	0	0	1
1	1	1	0	1	0	1	1	1	1	0	0	0	1	0	0	0	0	1	1	1	0	1	1	1	1	0	0	1
0	0	0	0	0	0	0	0	0	1	0	0	0	0	0	0	1	0	0	0	0	0	0	0	0	0	1	0	0
1	0	0	0	0	0	0	1	0	1	0	0	0	0	1	0	1	0	0	0	0	0	0	0	0	0	1	0	0
0	1	0	0	0	0	0	0	1	1	0	0	0	0	0	1	1	0	0	0	0	0	0	0	0	0	1	0	0
1	1	0	0	0	0	0	1	1	1	0	0	0	0	1	1	1	0	0	0	0	0	0	0	0	0	1	0	0
0	0	0	0	1	0	0	0	0	1	0	0	0	0	0	0	1	0	0	0	0	0	0	0	0	0	1	0	0
1	0	0	0	1	0	0	1	0	1	0	0	0	0	1	0	1	0	0	0	0	0	0	0	0	0	1	0	0
0	1	0	0	1	0	0	0	1	1	0	0	0	0	0	1	1	0	0	0	0	0	0	0	0	0	1	0	0
1	1	0	0	1	0	0	1	1	1	0	0	0	0	1	1	1	0	0	0	0	0	0	0	0	0	1	0	0
Cycles
1	0	0	0	0	0	0	1	0	1	0	0	0	0	1	0	1	0	0	0	0	0	0	0	0	0	0	0	0
1	0	0	0	0	0	0	1	0	0	0	0	0	0	1	0	1	0	0	0	0	0	0	0	0	0	1	0	0
1	0	0	0	0	0	0	1	0	1	0	0	0	0	1	0	0	0	0	0	0	0	0	0	0	0	1	0	0
1	0	0	0	0	0	0	1	0	1	0	0	0	0	1	0	0	0	0	0	0	0	0	0	0	0	0	0	0
1	0	0	0	0	0	0	1	0	0	0	0	0	0	1	0	1	0	0	0	0	0	0	0	0	0	0	0	0
1	0	0	0	0	0	0	1	0	0	0	0	0	0	1	0	0	0	0	0	0	0	0	0	0	0	1	0	0
1	0	0	0	1	0	0	1	0	1	0	0	0	0	1	0	0	0	0	0	0	0	0	0	0	0	0	0	0
1	0	0	0	1	0	0	1	0	0	0	0	0	0	1	0	1	0	0	0	0	0	0	0	0	0	0	0	0
1	0	0	0	1	0	0	1	0	0	0	0	0	0	1	0	0	0	0	0	0	0	0	0	0	0	1	0	0
1	0	0	0	1	0	0	1	0	1	0	0	0	0	1	1	0	0	0	0	0	0	0	0	0	0	0	0	0
1	0	0	0	1	0	0	1	0	0	0	0	0	0	1	1	0	0	0	0	0	0	0	0	0	0	1	0	0
1	0	0	0	1	0	0	1	0	1	0	0	0	0	1	0	0	0	0	0	0	0	0	0	0	0	1	0	0
1	1	0	0	1	0	0	1	1	1	0	0	0	0	1	1	0	0	0	0	0	0	0	0	0	0	0	0	0
1	1	0	0	1	0	0	1	1	0	0	0	0	0	1	1	1	0	0	0	0	0	0	0	0	0	0	0	0
1	1	0	0	1	0	0	1	1	0	0	0	0	0	1	1	0	0	0	0	0	0	0	0	0	0	1	0	0
1	1	0	0	1	0	0	1	1	1	0	0	0	0	1	1	1	0	0	0	0	0	0	0	0	0	0	0	0
1	1	0	0	1	0	0	1	1	0	0	0	0	0	1	1	1	0	0	0	0	0	0	0	0	0	1	0	0
1	1	0	0	1	0	0	1	1	1	0	0	0	0	1	1	0	0	0	0	0	0	0	0	0	0	1	0	0
1	1	0	0	0	0	0	1	1	1	0	0	0	0	1	1	0	0	0	0	0	0	0	0	0	0	0	0	0
1	1	0	0	0	0	0	1	1	0	0	0	0	0	1	1	1	0	0	0	0	0	0	0	0	0	0	0	0
1	1	0	0	0	0	0	1	1	0	0	0	0	0	1	1	0	0	0	0	0	0	0	0	0	0	1	0	0
1	1	0	0	0	0	0	1	1	1	0	0	0	0	1	1	1	0	0	0	0	0	0	0	0	0	0	0	0
1	1	0	0	0	0	0	1	1	0	0	0	0	0	1	1	1	0	0	0	0	0	0	0	0	0	1	0	0
1	1	0	0	0	0	0	1	1	1	0	0	0	0	1	1	0	0	0	0	0	0	0	0	0	0	1	0	0
0	1	0	0	0	0	0	0	1	1	0	0	0	0	0	1	0	0	0	0	0	0	0	0	0	0	0	0	0
0	1	0	0	0	0	0	0	1	0	0	0	0	0	0	1	1	0	0	0	0	0	0	0	0	0	0	0	0
0	1	0	0	0	0	0	0	1	0	0	0	0	0	0	1	0	0	0	0	0	0	0	0	0	0	1	0	0
0	1	0	0	0	0	0	0	1	1	0	0	0	0	0	1	1	0	0	0	0	0	0	0	0	0	0	0	0
0	1	0	0	0	0	0	0	1	0	0	0	0	0	0	1	1	0	0	0	0	0	0	0	0	0	1	0	0
0	1	0	0	0	0	0	0	1	1	0	0	0	0	0	1	0	0	0	0	0	0	0	0	0	0	1	0	0
0	1	0	0	1	0	0	0	1	1	0	0	0	0	0	1	0	0	0	0	0	0	0	0	0	0	0	0	0
0	1	0	0	1	0	0	0	1	0	0	0	0	0	0	1	1	0	0	0	0	0	0	0	0	0	0	0	0
0	1	0	0	1	0	0	0	1	0	0	0	0	0	0	1	0	0	0	0	0	0	0	0	0	0	1	0	0
0	1	0	0	1	0	0	0	1	1	0	0	0	0	0	1	1	0	0	0	0	0	0	0	0	0	0	0	0
0	1	0	0	1	0	0	0	1	0	0	0	0	0	0	1	1	0	0	0	0	0	0	0	0	0	1	0	0
0	1	0	0	1	0	0	0	1	1	0	0	0	0	0	1	0	0	0	0	0	0	0	0	0	0	1	0	0
0	0	0	0	1	0	0	0	0	1	0	0	0	0	0	0	0	0	0	0	0	0	0	0	0	0	0	0	0
0	0	0	0	1	0	0	0	0	0	0	0	0	0	0	0	1	0	0	0	0	0	0	0	0	0	0	0	0
0	0	0	0	1	0	0	0	0	0	0	0	0	0	0	0	0	0	0	0	0	0	0	0	0	0	1	0	0
0	0	0	0	1	0	0	0	0	1	0	0	0	0	0	0	1	0	0	0	0	0	0	0	0	0	0	0	0
0	0	0	0	1	0	0	0	0	0	0	0	0	0	0	0	1	0	0	0	0	0	0	0	0	0	1	0	0
0	0	0	0	1	0	0	0	0	1	0	0	0	0	0	0	0	0	0	0	0	0	0	0	0	0	1	0	0
0	0	0	0	0	0	0	0	0	1	0	0	0	0	0	0	1	0	0	0	0	0	0	0	0	0	0	0	0
0	0	0	0	0	0	0	0	0	0	0	0	0	0	0	0	1	0	0	0	0	0	0	0	0	0	1	0	0
0	0	0	0	0	0	0	0	0	1	0	0	0	0	0	0	0	0	0	0	0	0	0	0	0	0	1	0	0
0	0	0	0	0	0	0	0	0	1	0	0	0	0	0	0	0	0	0	0	0	0	0	0	0	0	0	0	0
0	0	0	0	0	0	0	0	0	0	0	0	0	0	0	0	1	0	0	0	0	0	0	0	0	0	0	0	0
0	0	0	0	0	0	0	0	0	0	0	0	0	0	0	0	0	0	0	0	0	0	0	0	0	0	1	0	0
